# Supplementary material
Source: MDPI journal article supplement (https://www.mdpi.com/2073-4344/11/11/1273)
Supplement: s1 [file s1]

# **Pd-HPW/SiO<sub>2</sub> Bi-Functional catalyst: Sonochemical Synthesis, Characterization and effect on octahydroquinazolinone synthesis**

Md. A. Bakht<sup>1\*</sup>, Mshari. Alotaibi<sup>1</sup>, Abdulrahman I. Alharthi<sup>1</sup>, Israf Ud Din<sup>1</sup>, Abuzer Ali<sup>2</sup>, Amena Ali<sup>3</sup>, M.J. Ahsan<sup>4</sup>

<sup>1</sup>Department of Chemistry, College Science and Humanities, Prince Sattam Bin Abdulaziz University, PO. Box no. 83, Al-Kharj 11942, Saudi Arabia.

<sup>2</sup>Department of Pharmacognosy, College of Pharmacy, Taif University, P.O. Box 11099, Taif 21944 Saudi Arabia

<sup>3</sup>Department of Pharmaceutical Chemistry, College of Pharmacy, Taif University, P.O. Box 11099, Taif 21944 Saudi Arabia

<sup>4</sup>Department of Pharmaceutical Chemistry, Maharishi Arvind College of Pharmacy, Ambabari

Circle, Jaipur, Rajasthan 302 039, India.

Correspondence [m.bakht@psau.edu.sa](mailto:m.bakht@psau.edu.sa); Tel.: +966-553753763

**Supplemental Materials : NMR Spectral data**

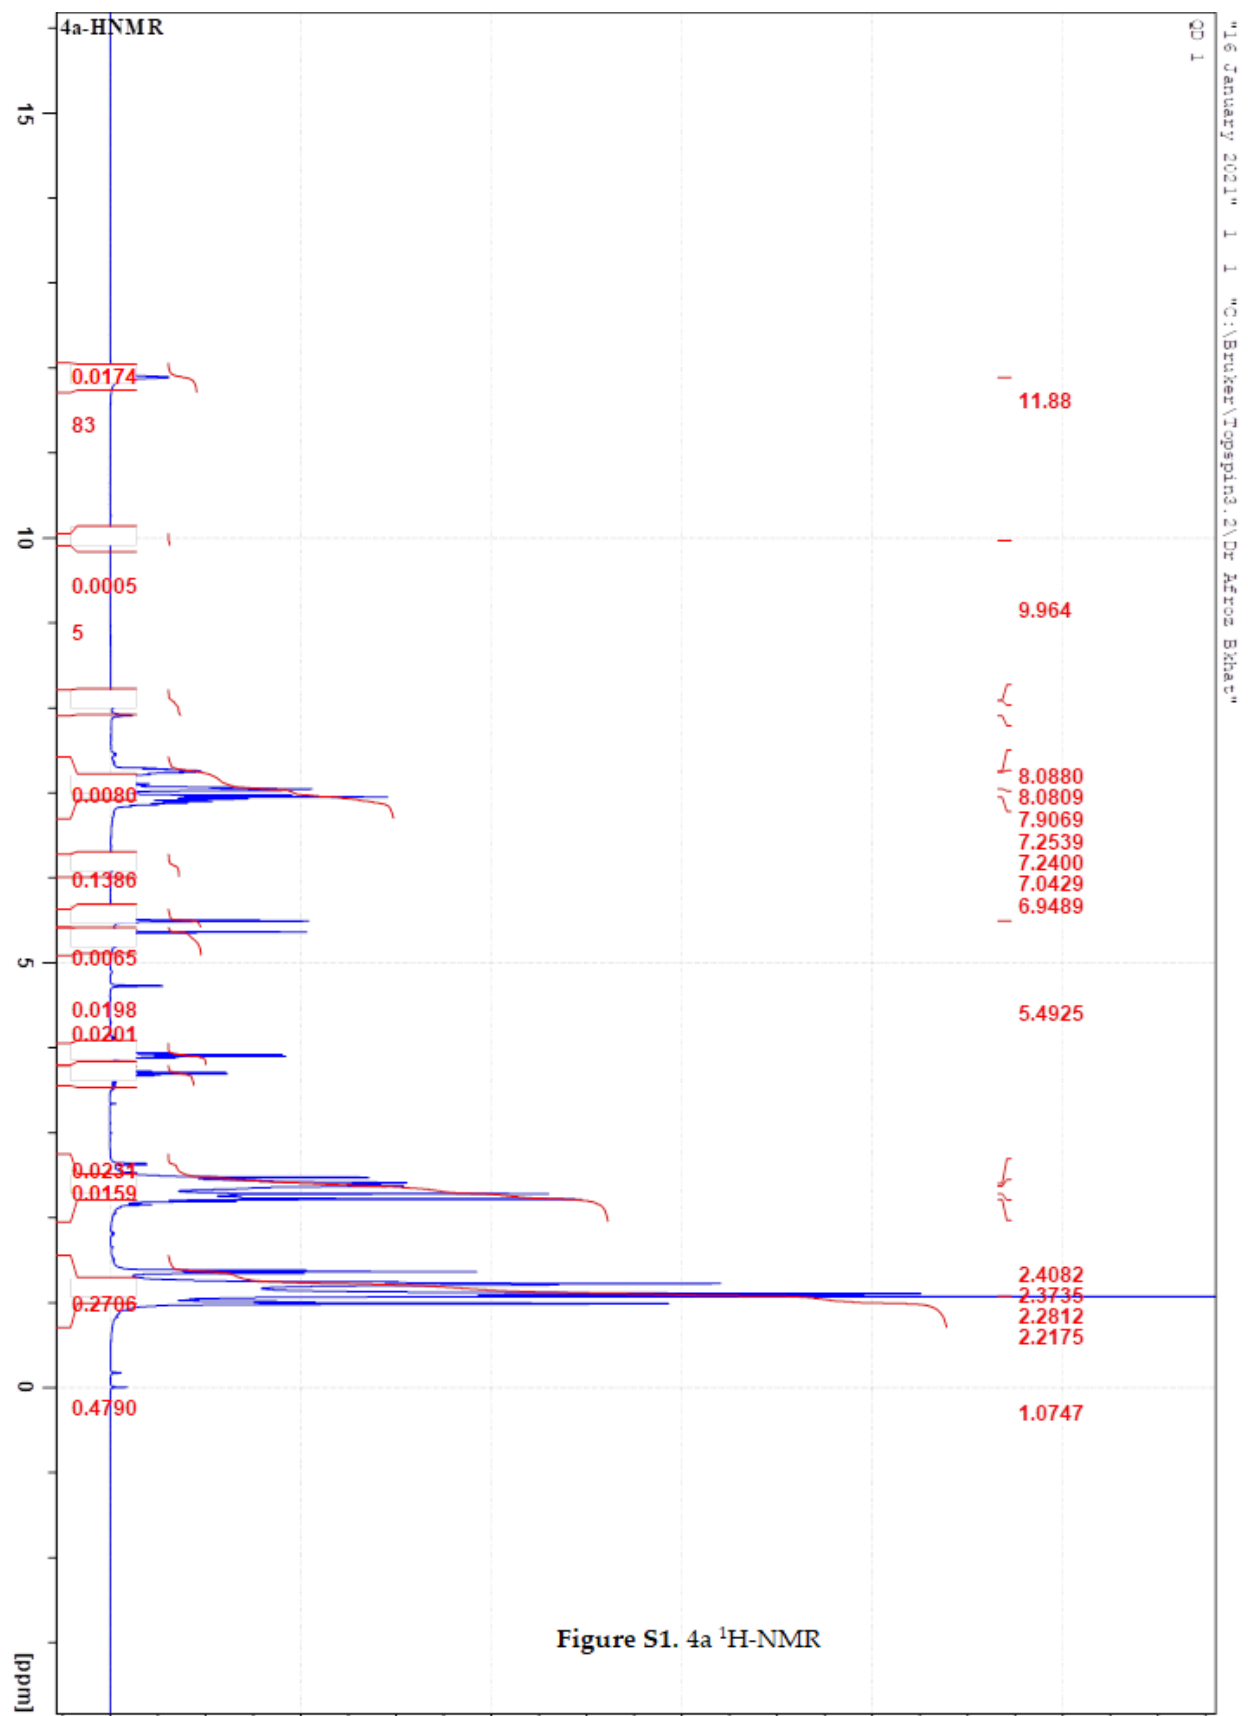

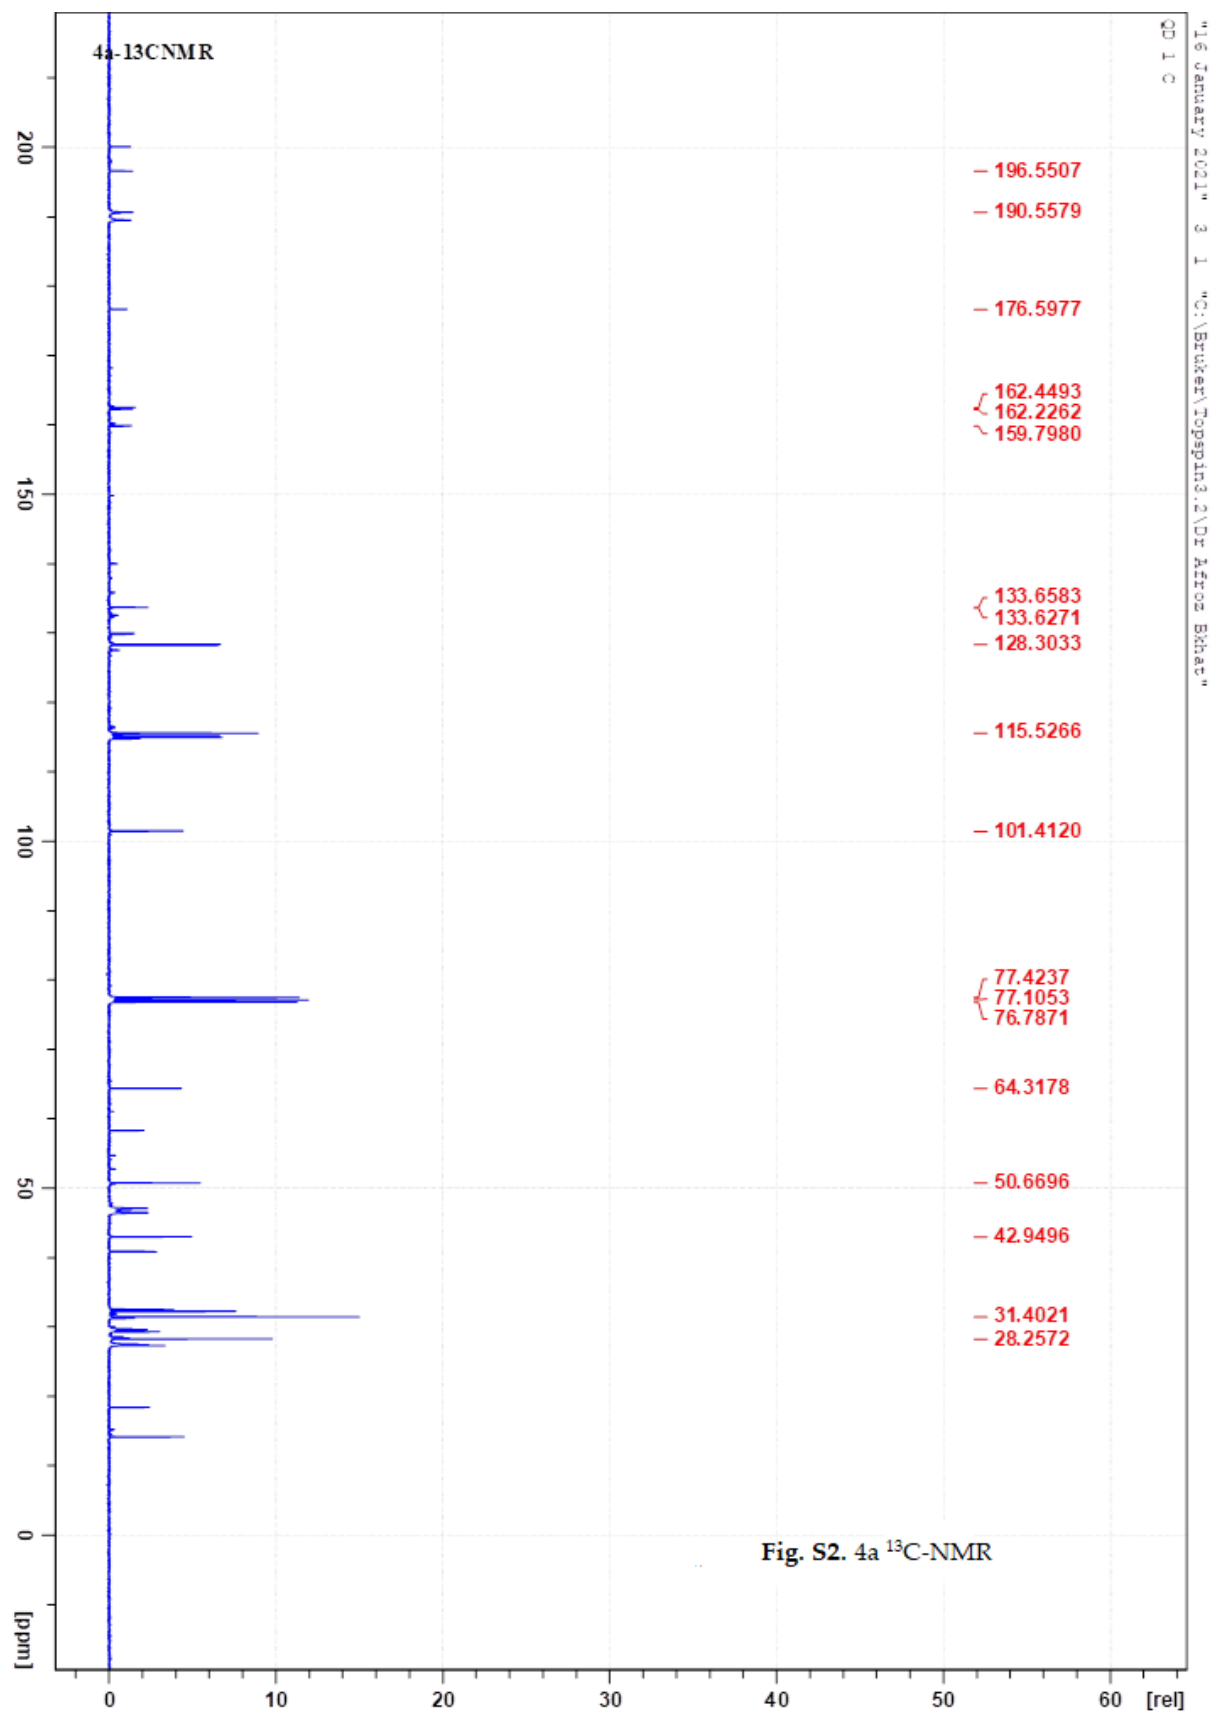

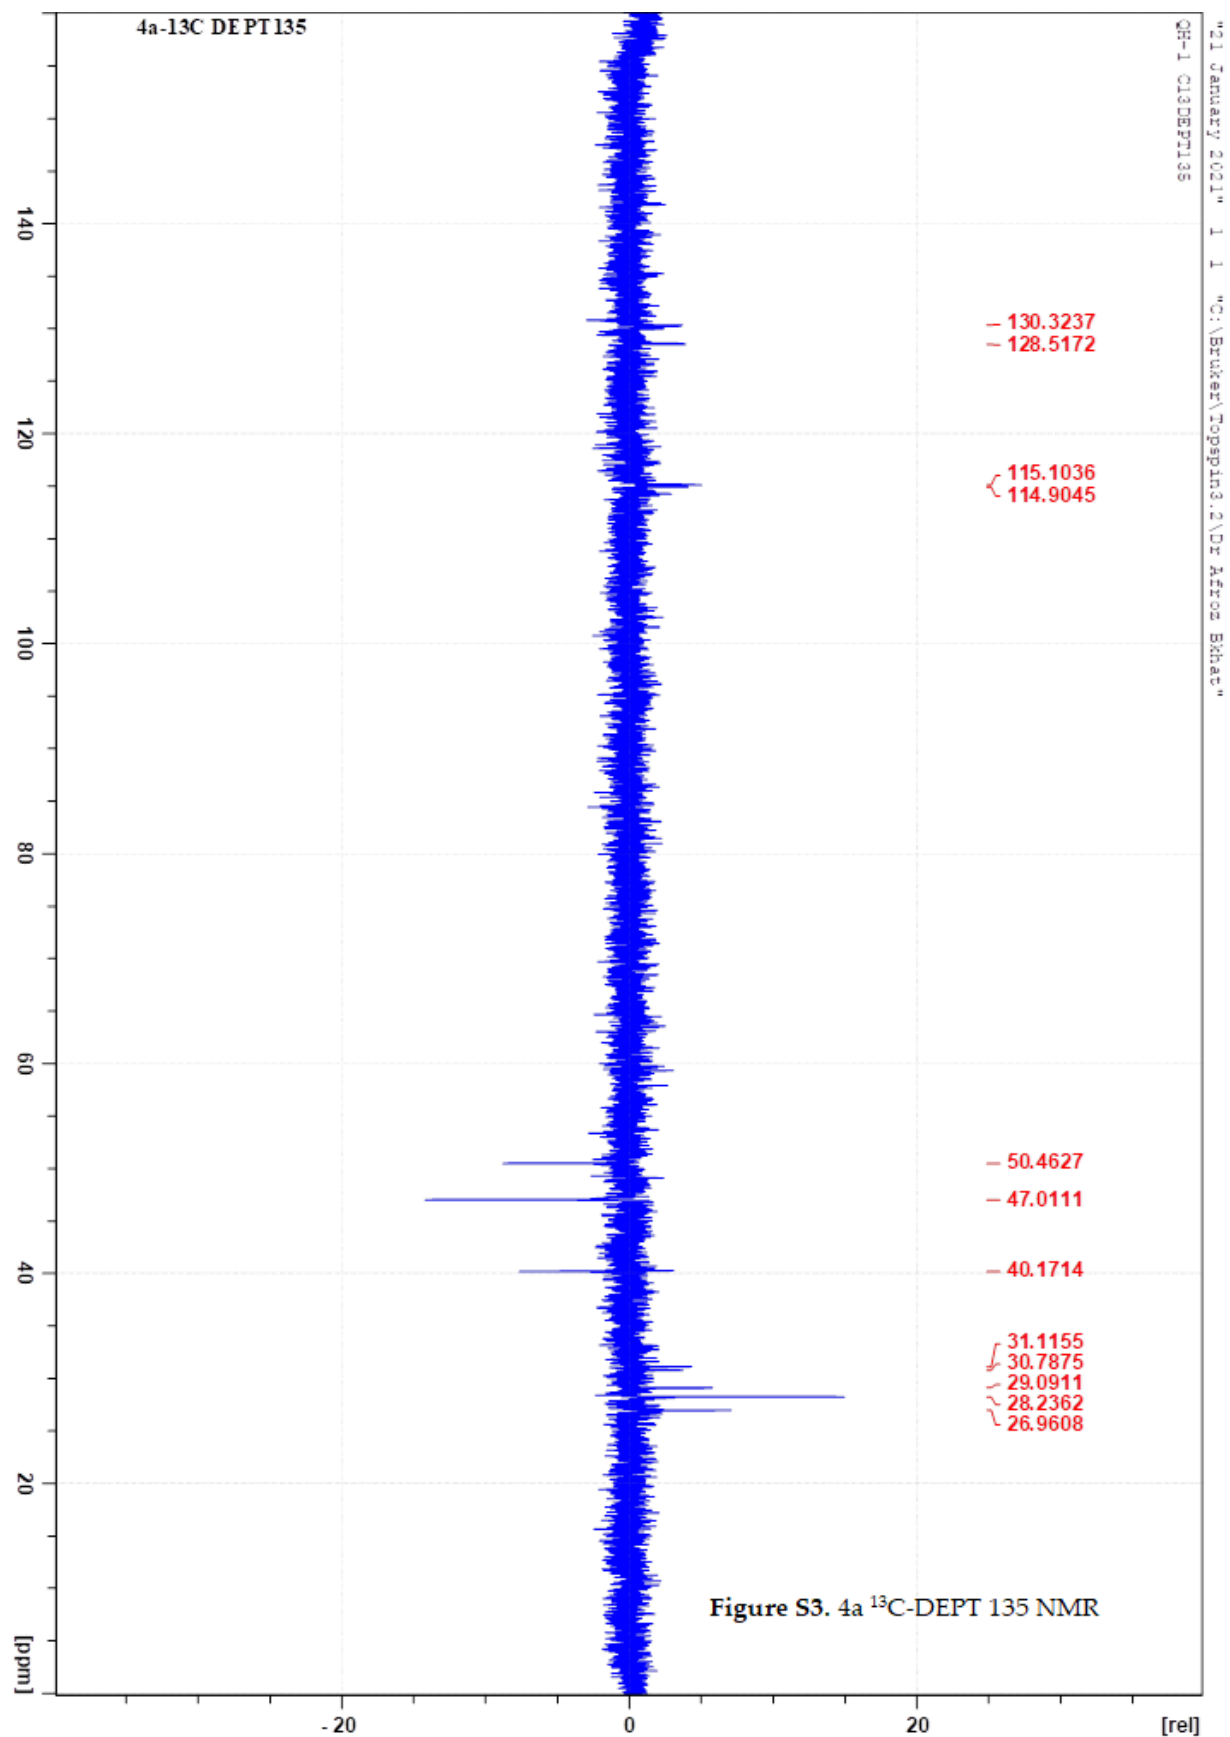

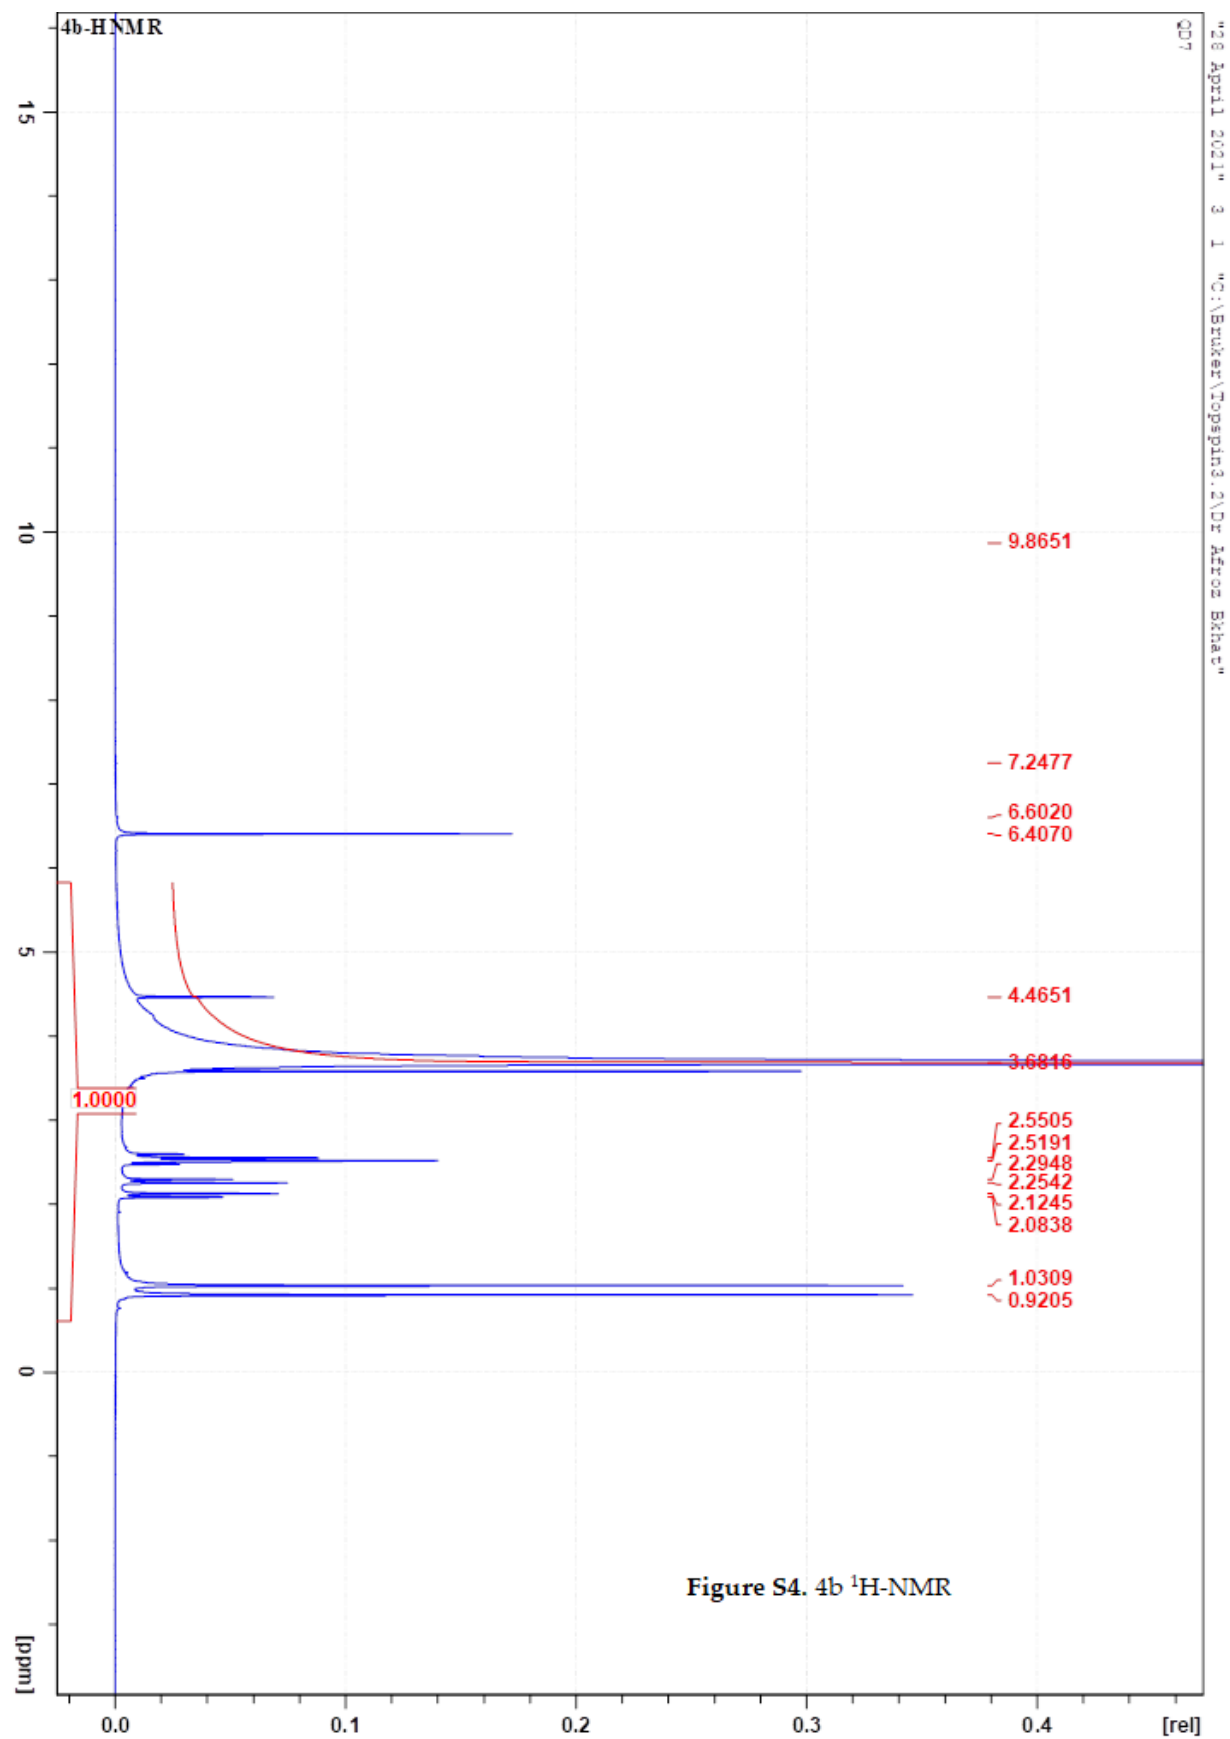

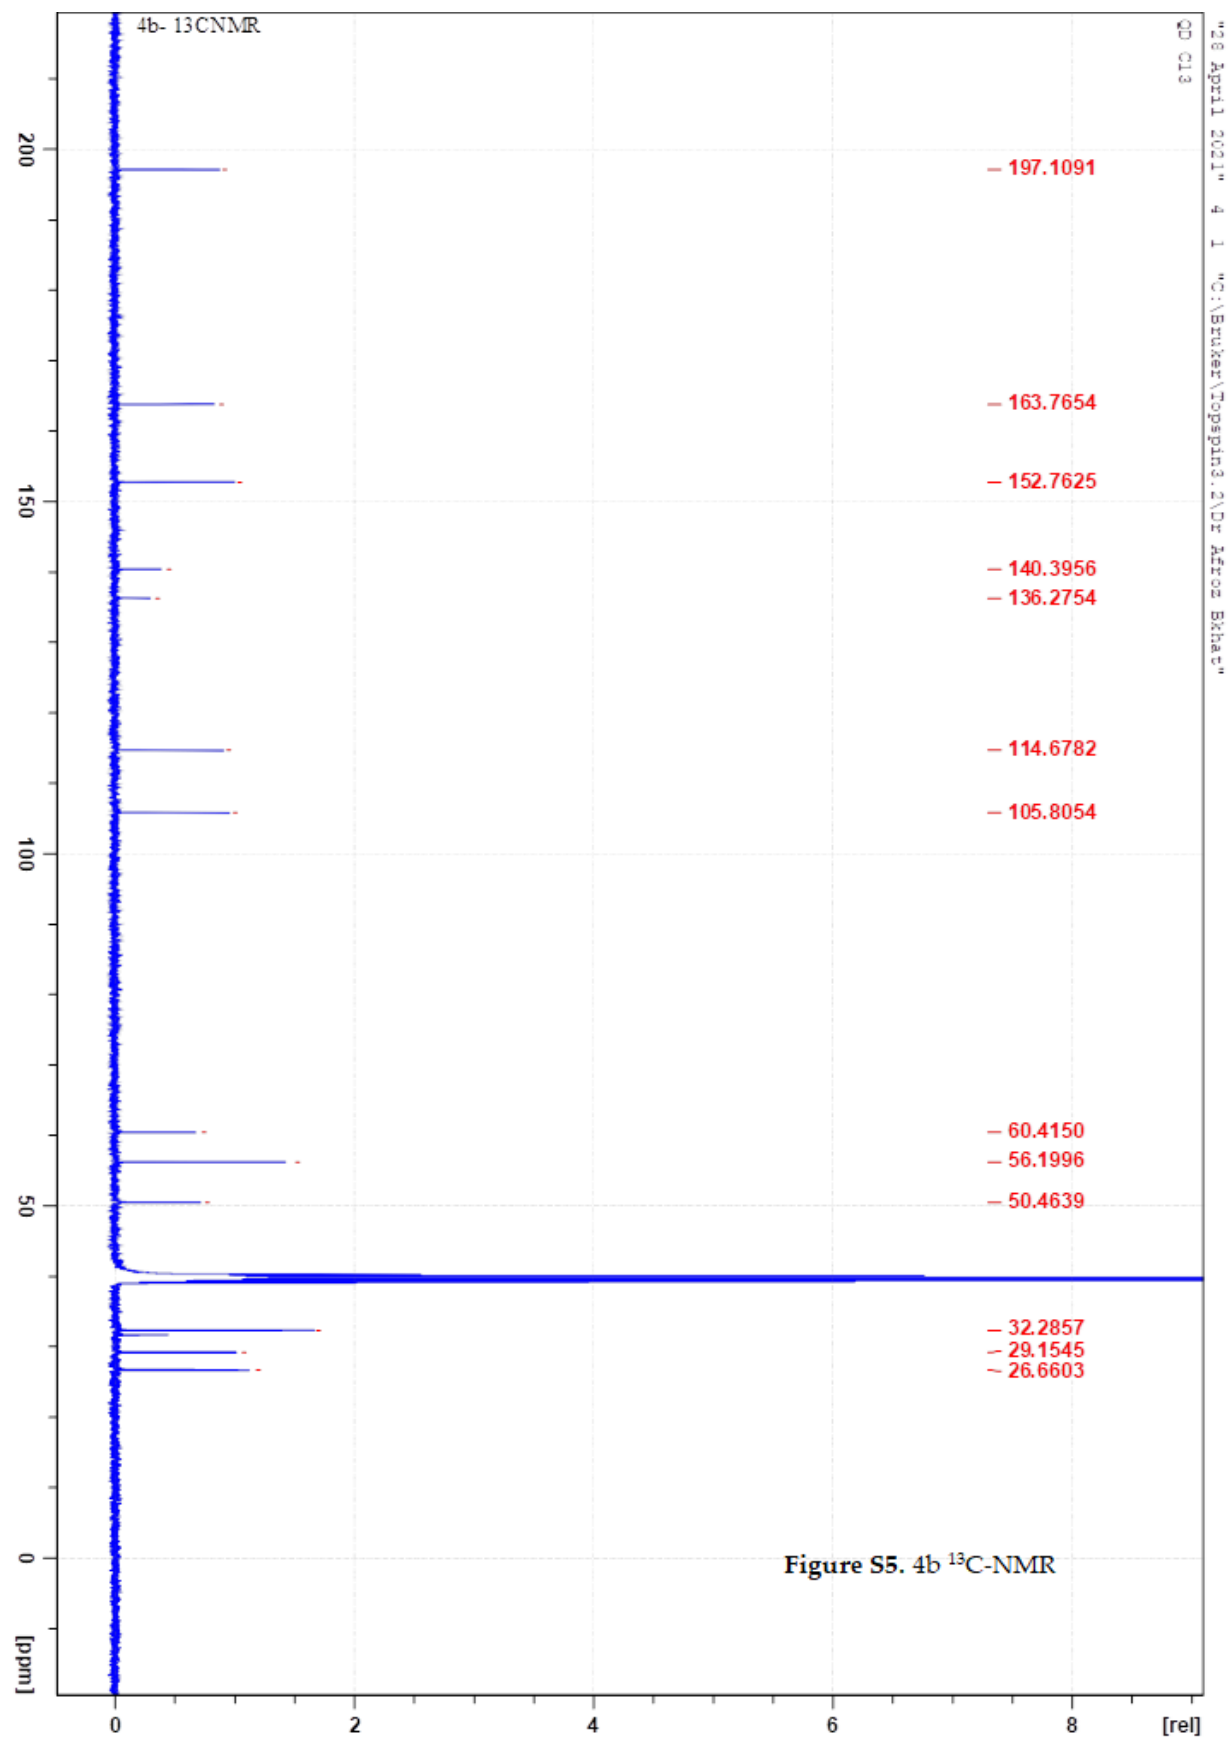

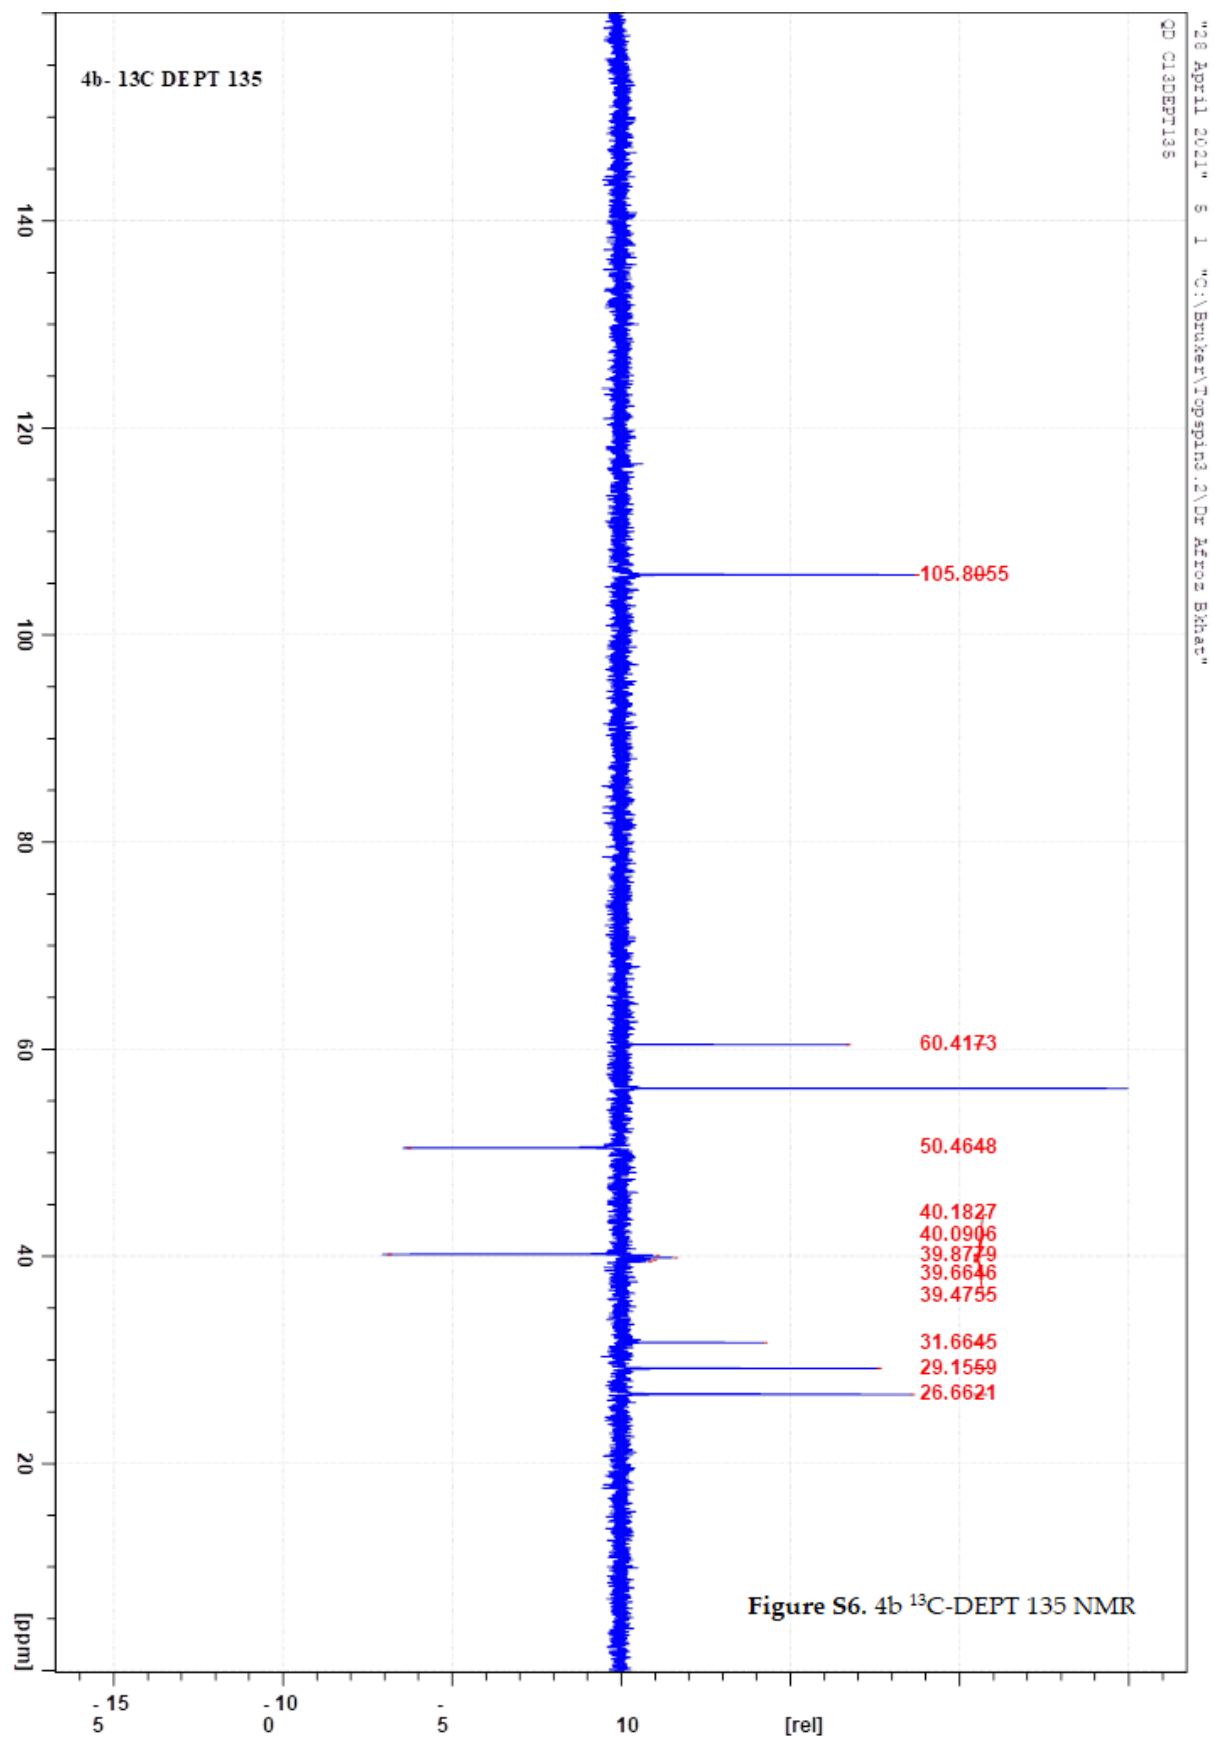

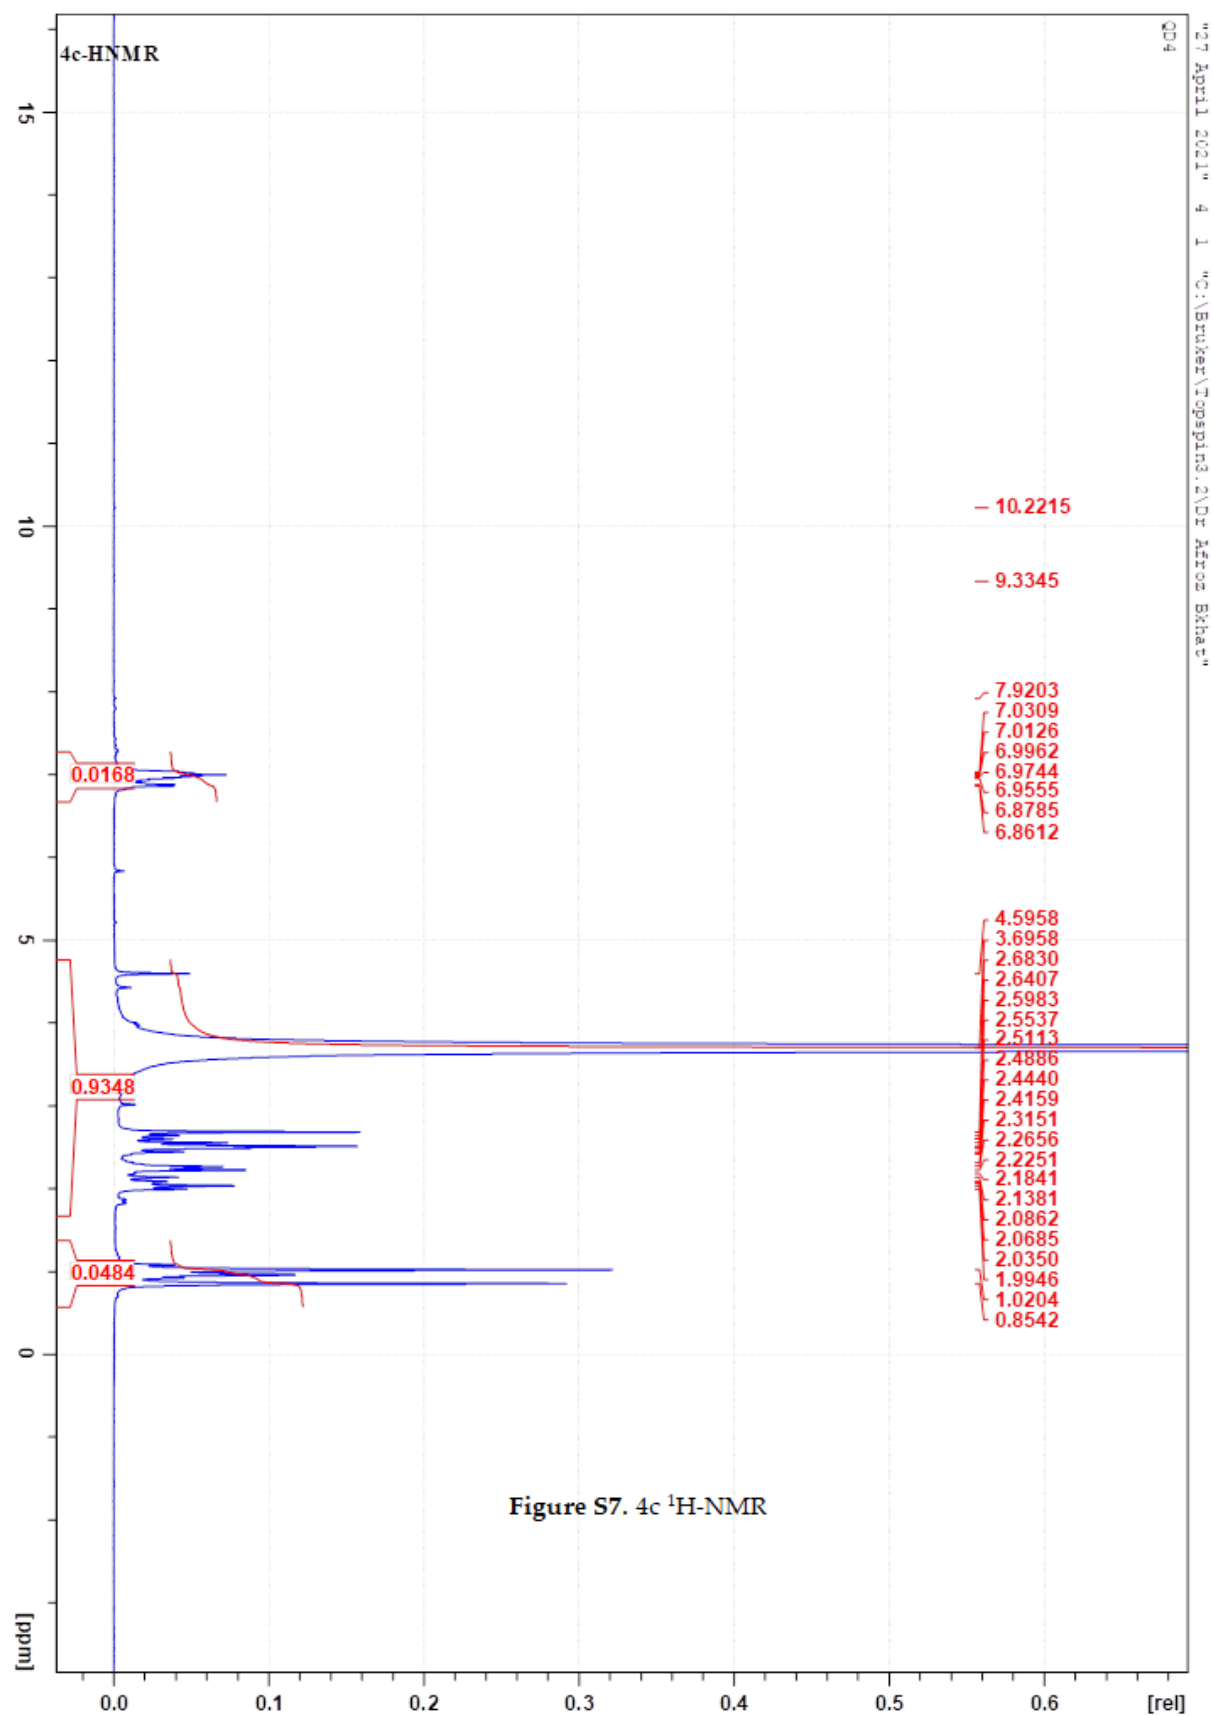



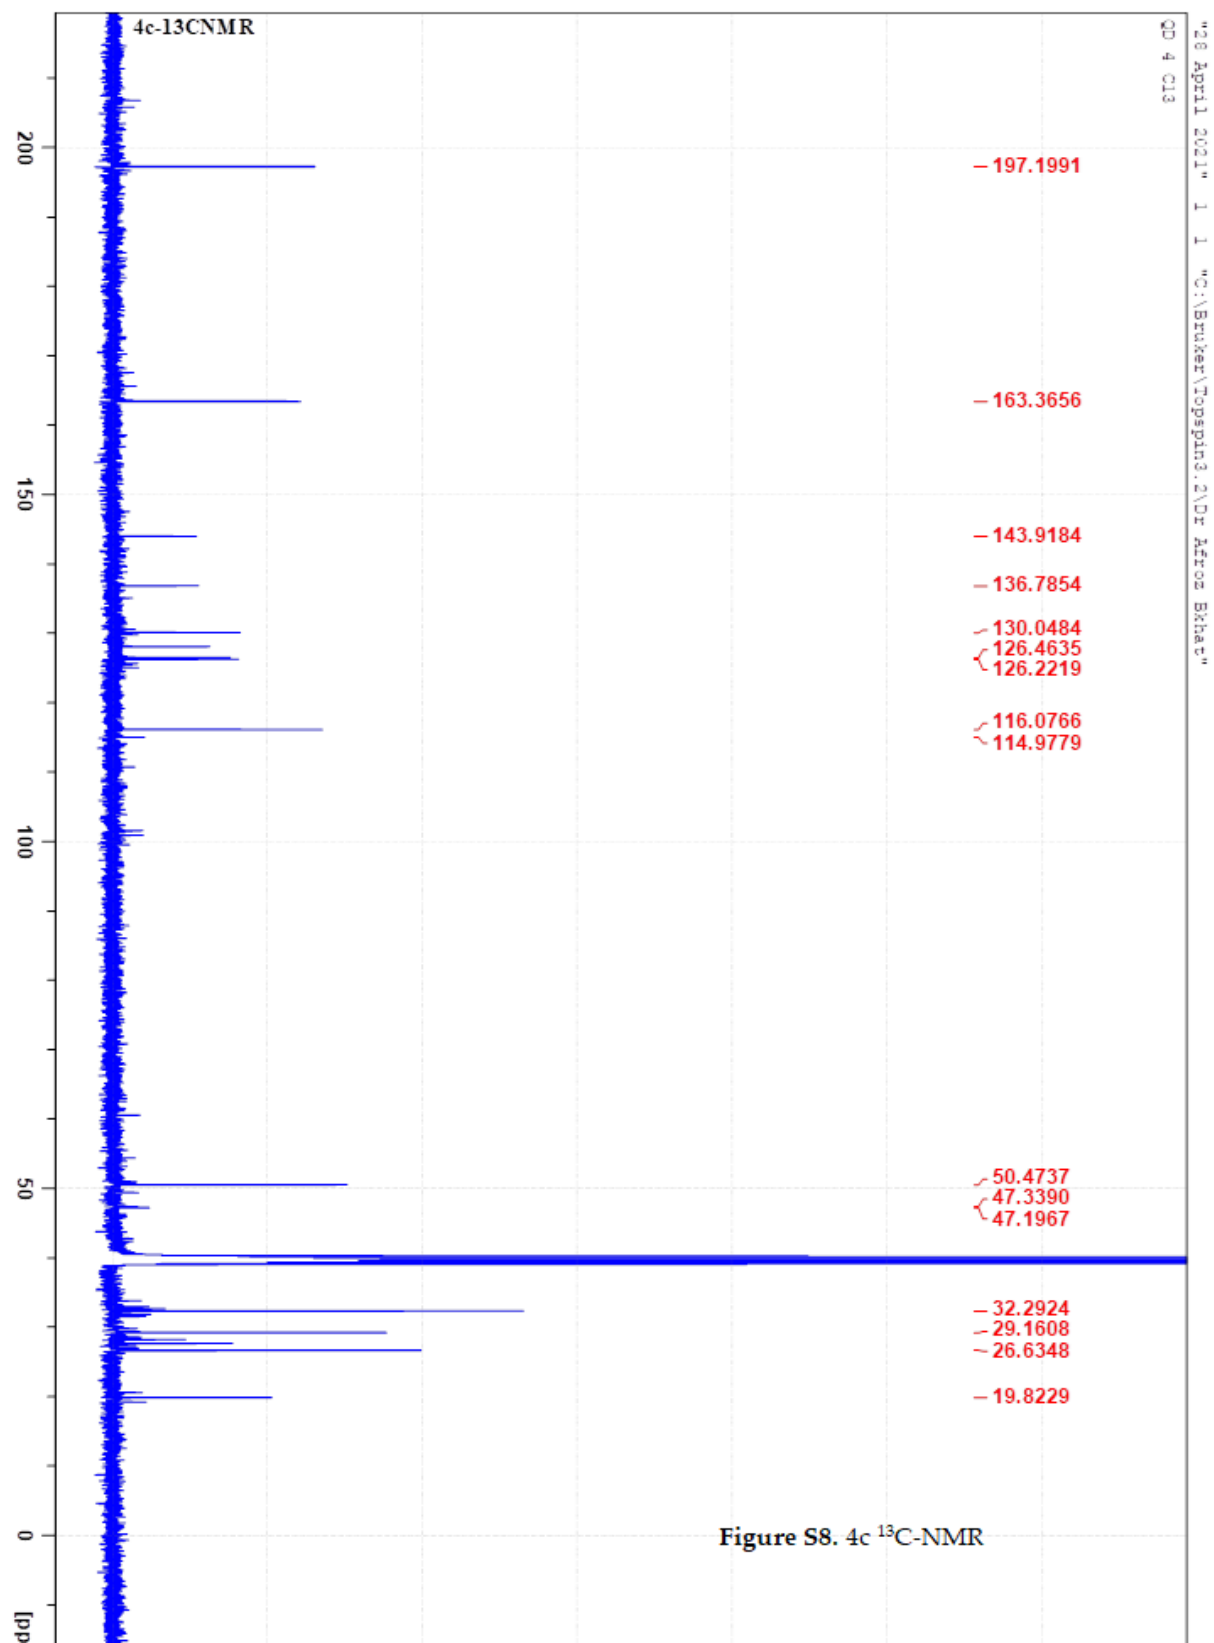Figure S8. 4c <sup>13</sup>C-NMR

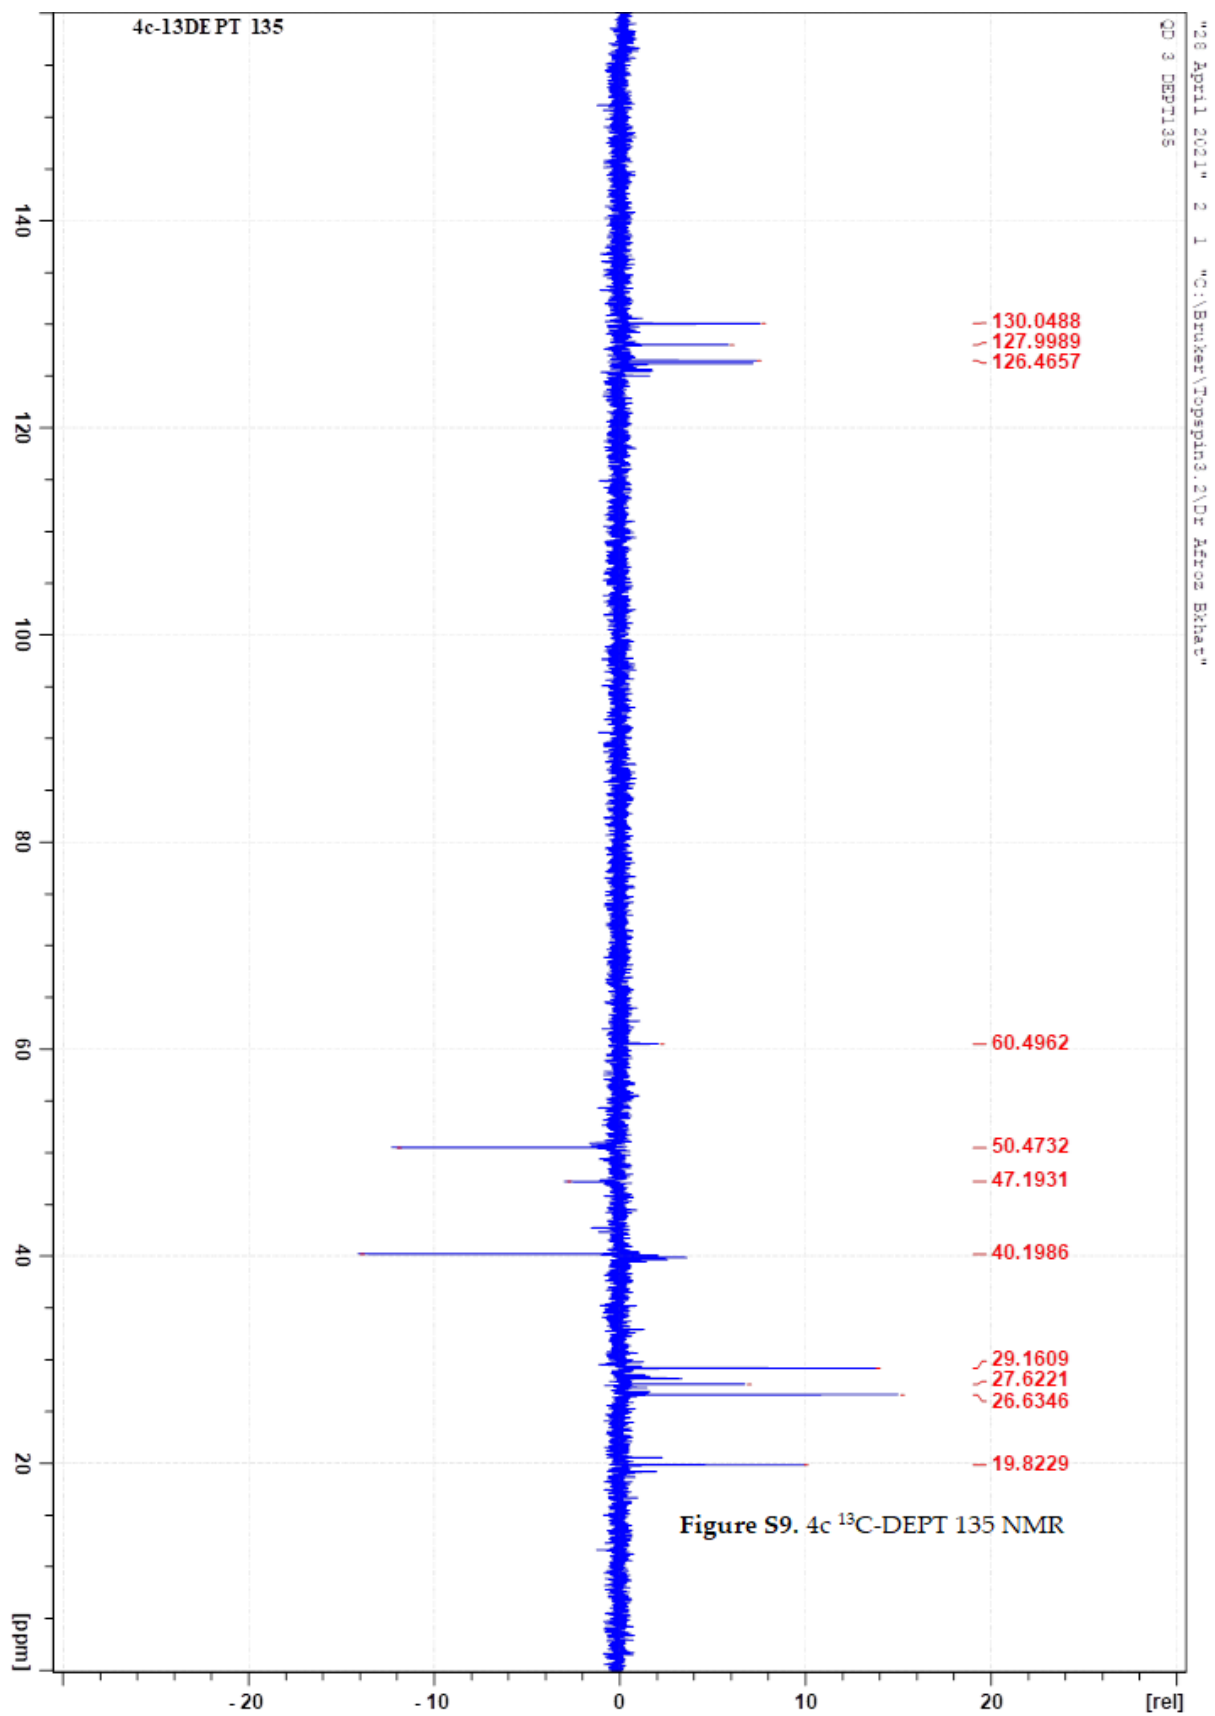

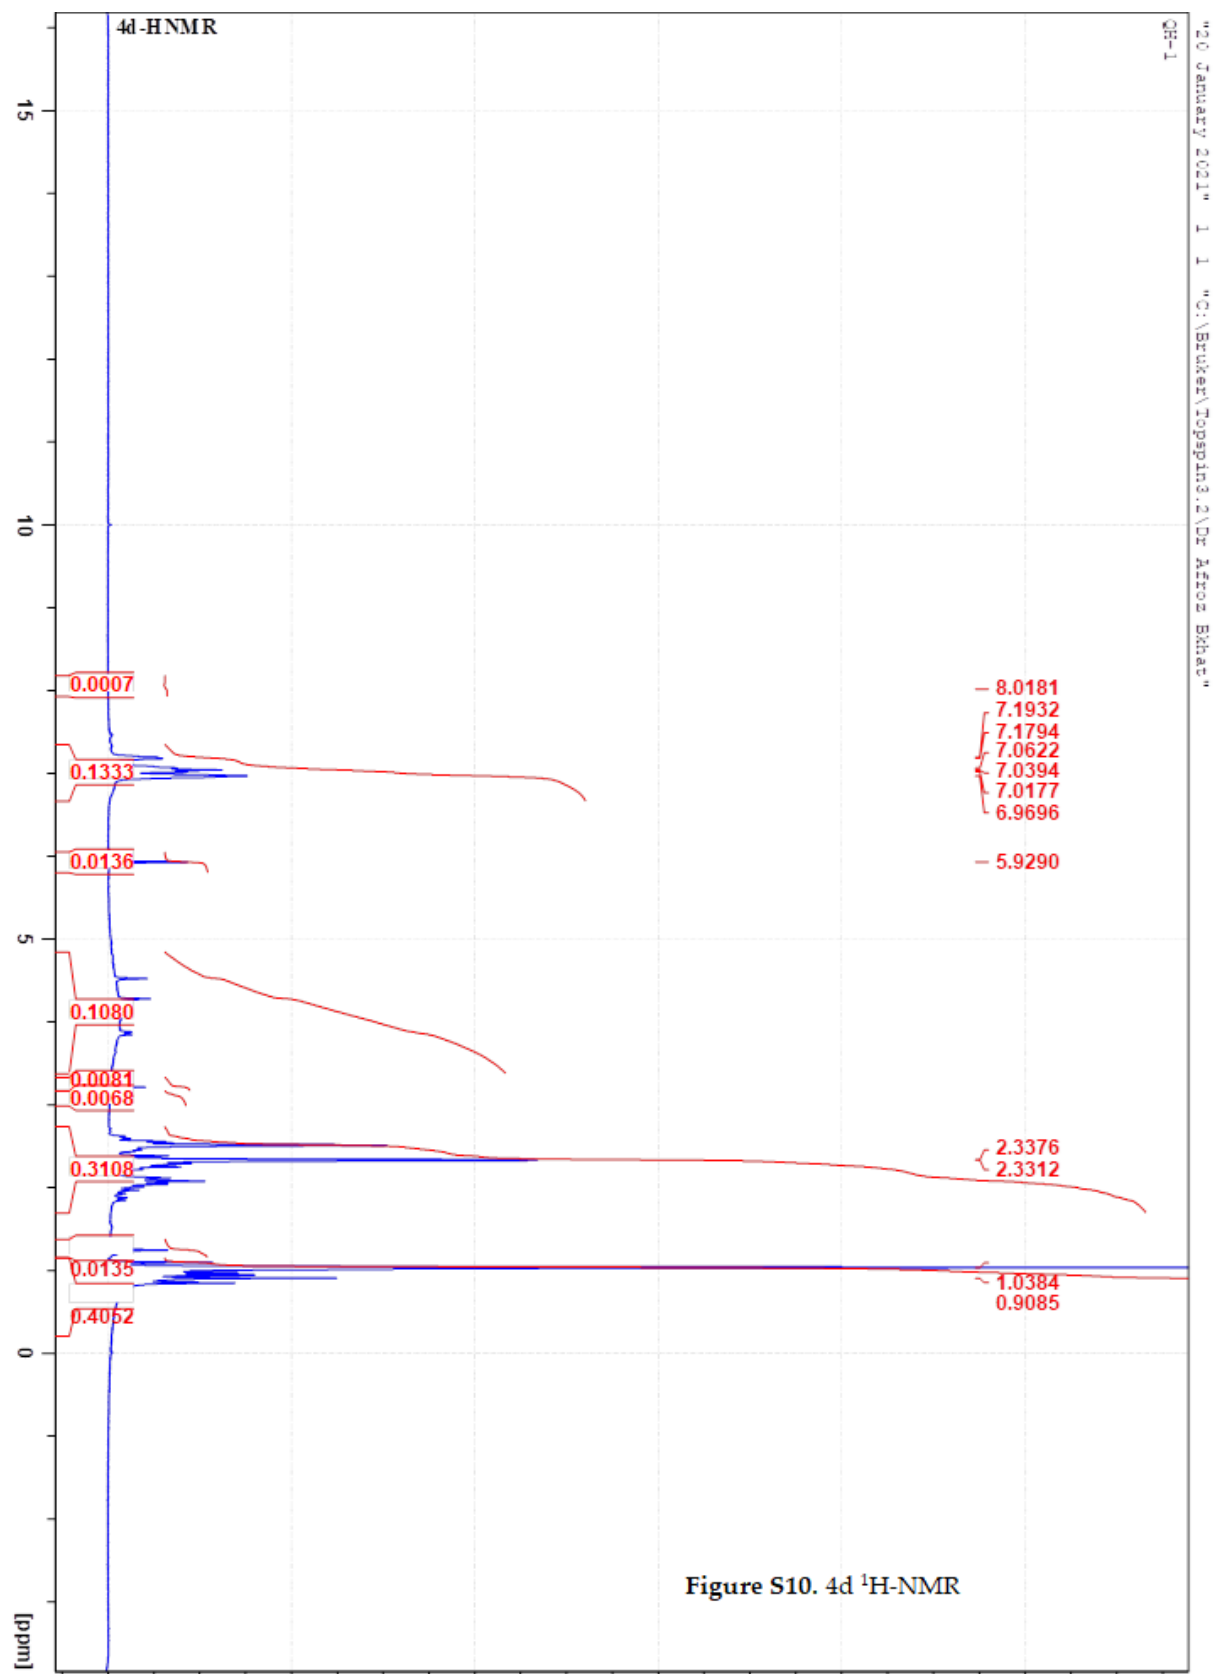Figure S10. 4d  $^1\text{H}$ -NMR

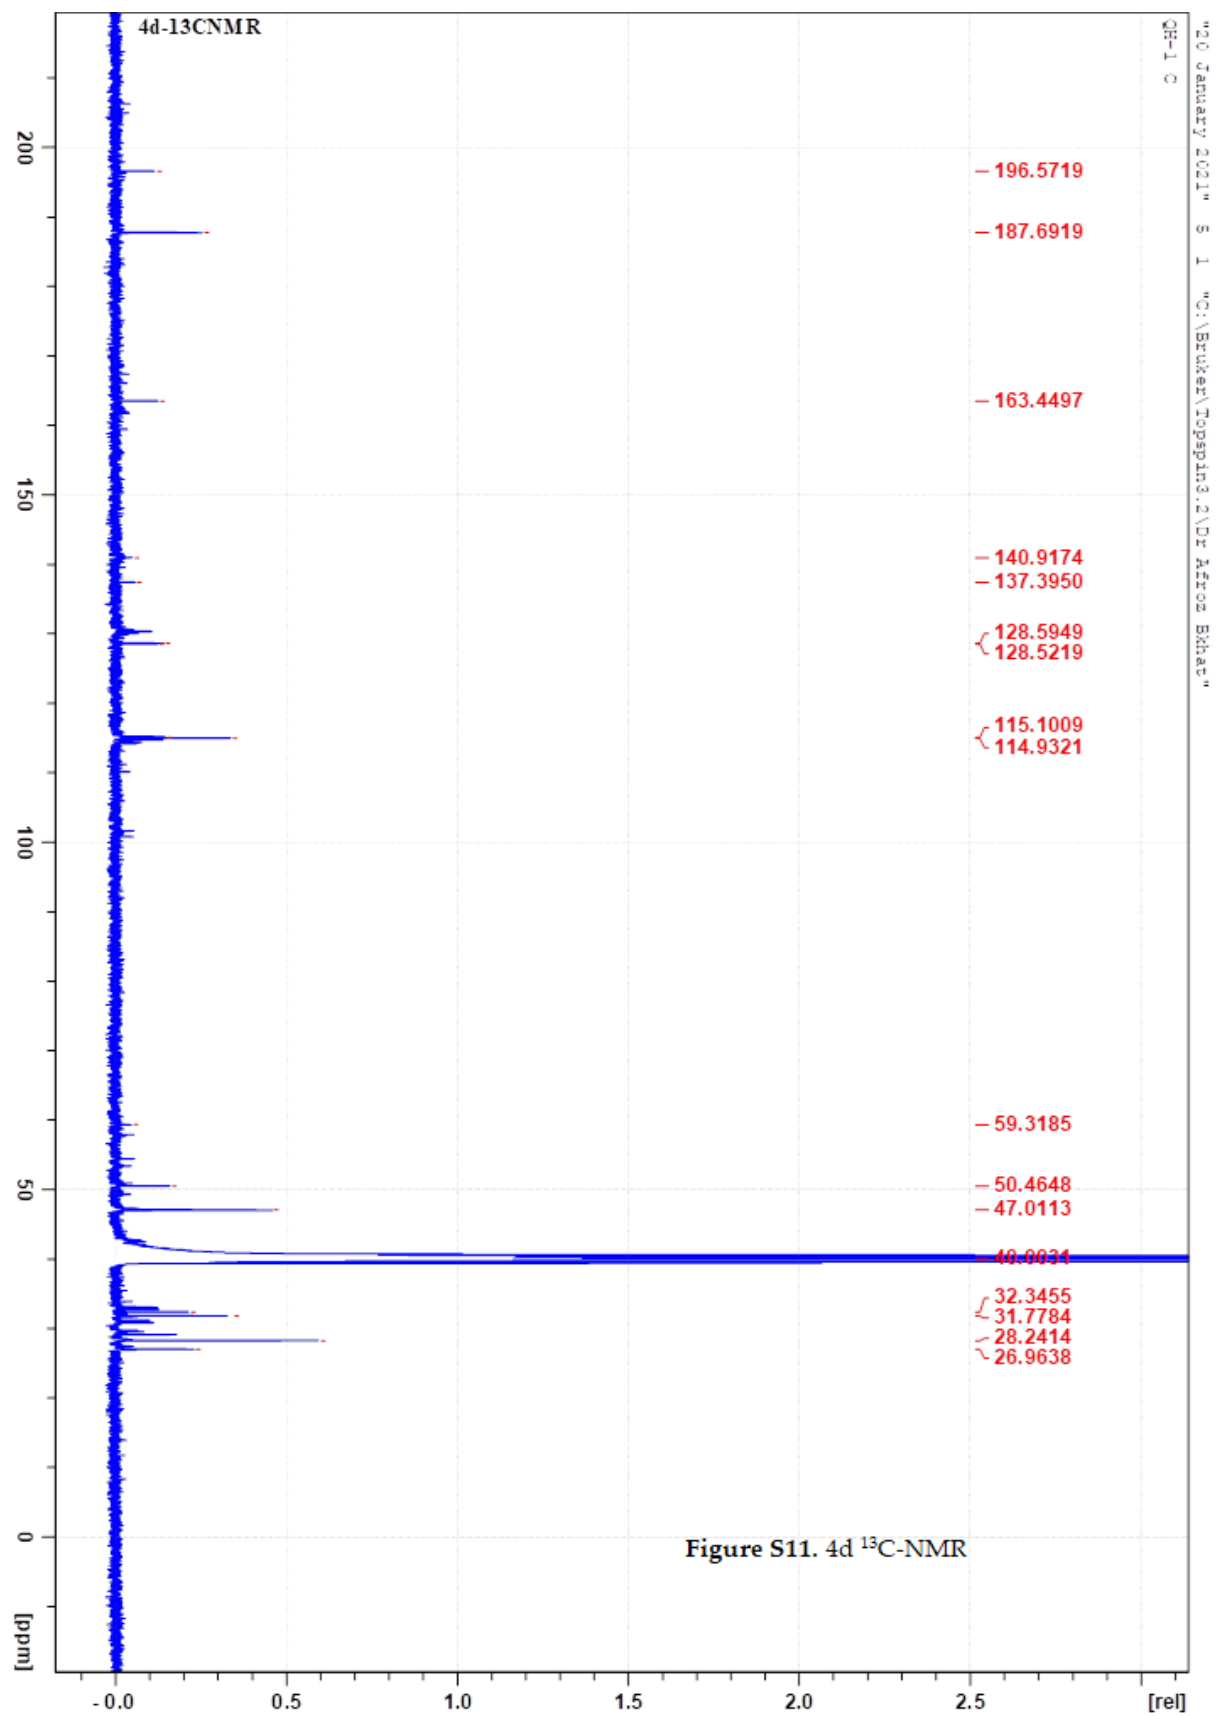

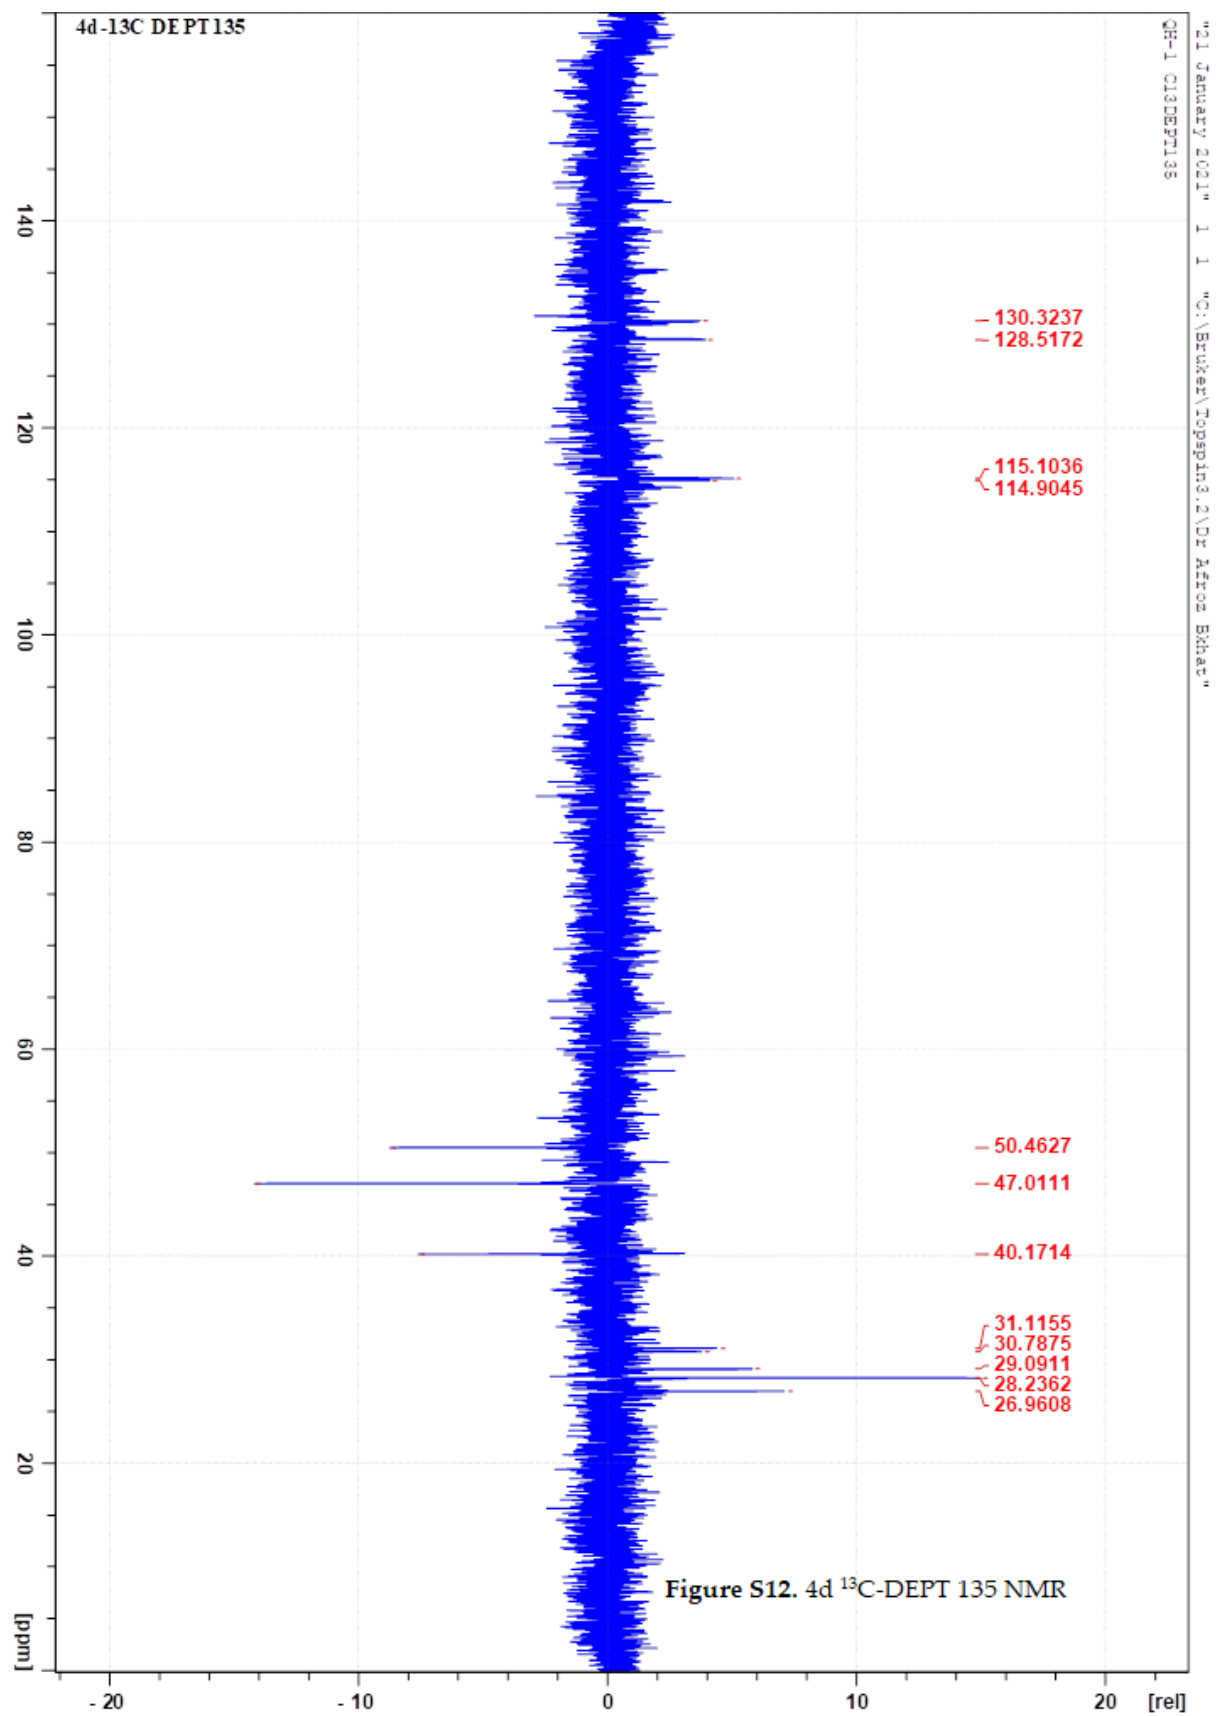

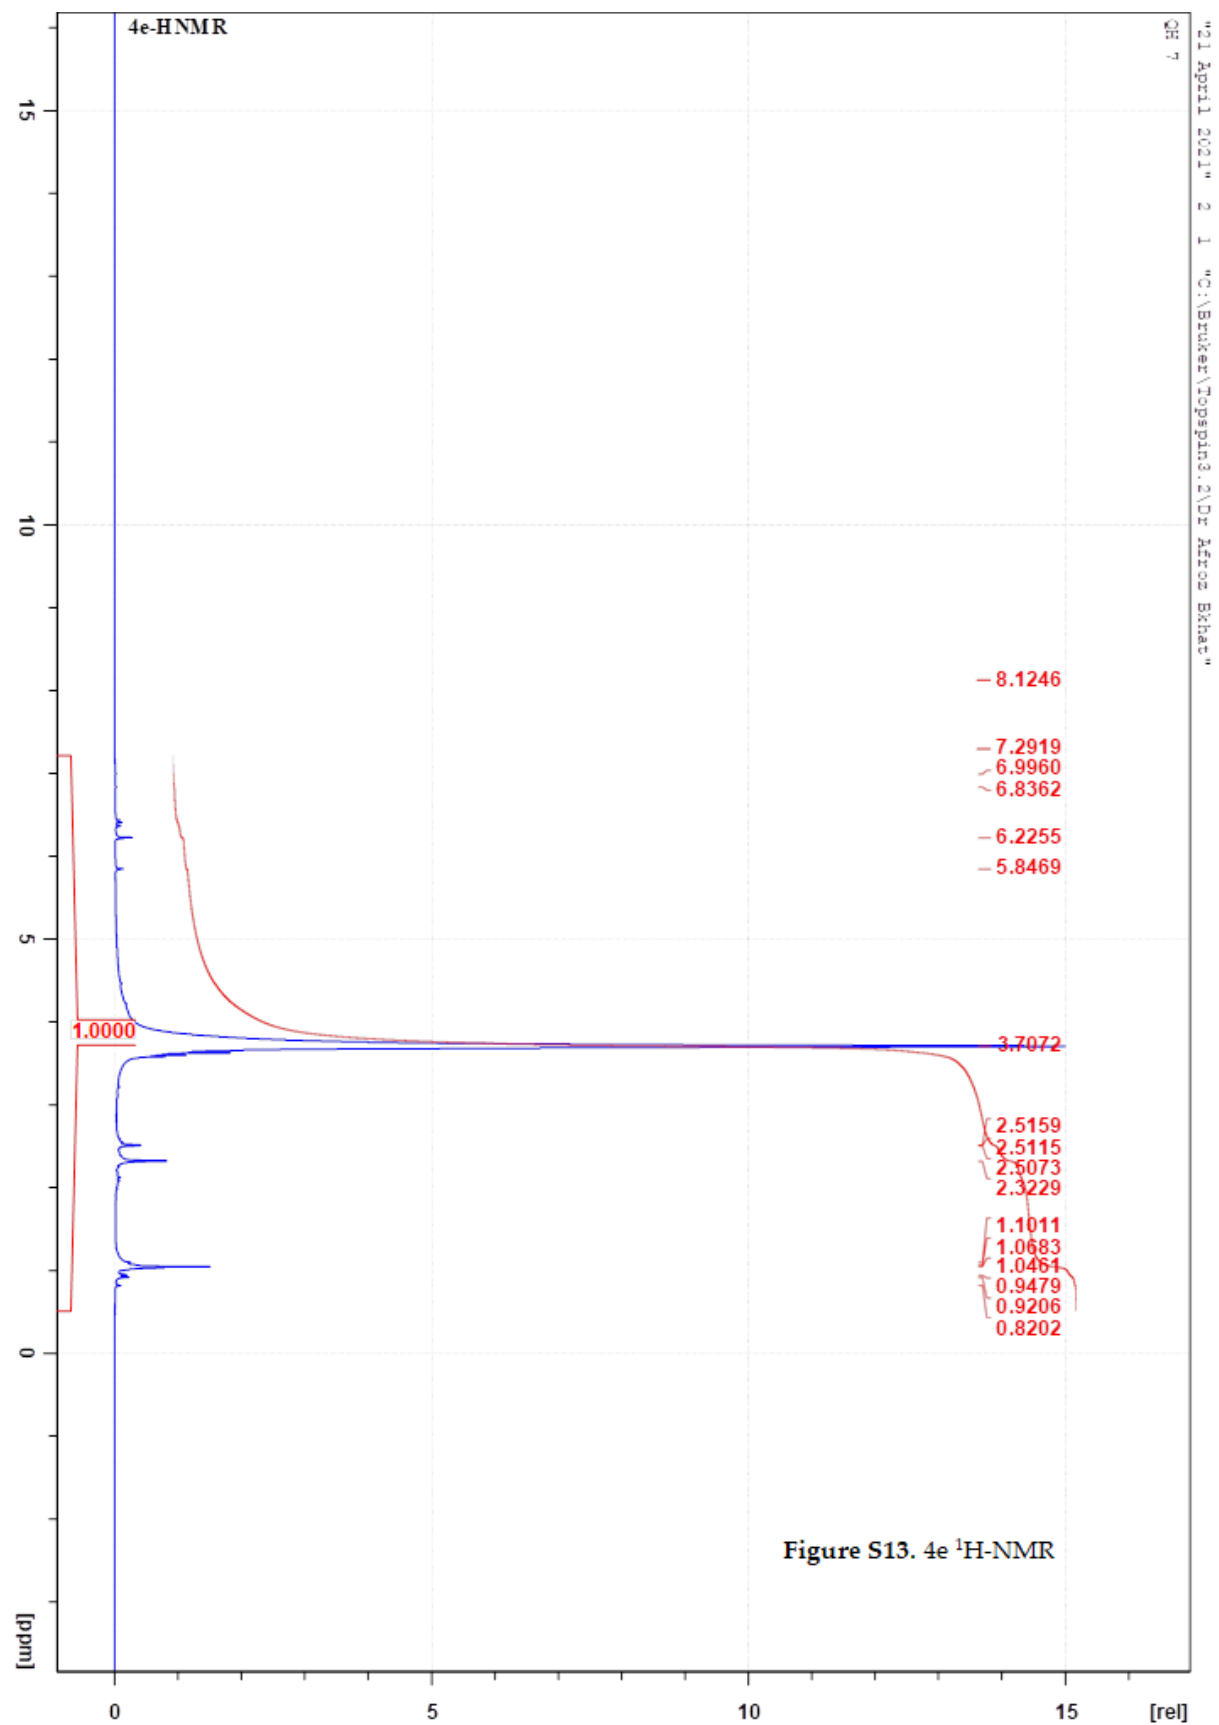Figure S13. 4e  $^1\text{H}$ -NMR

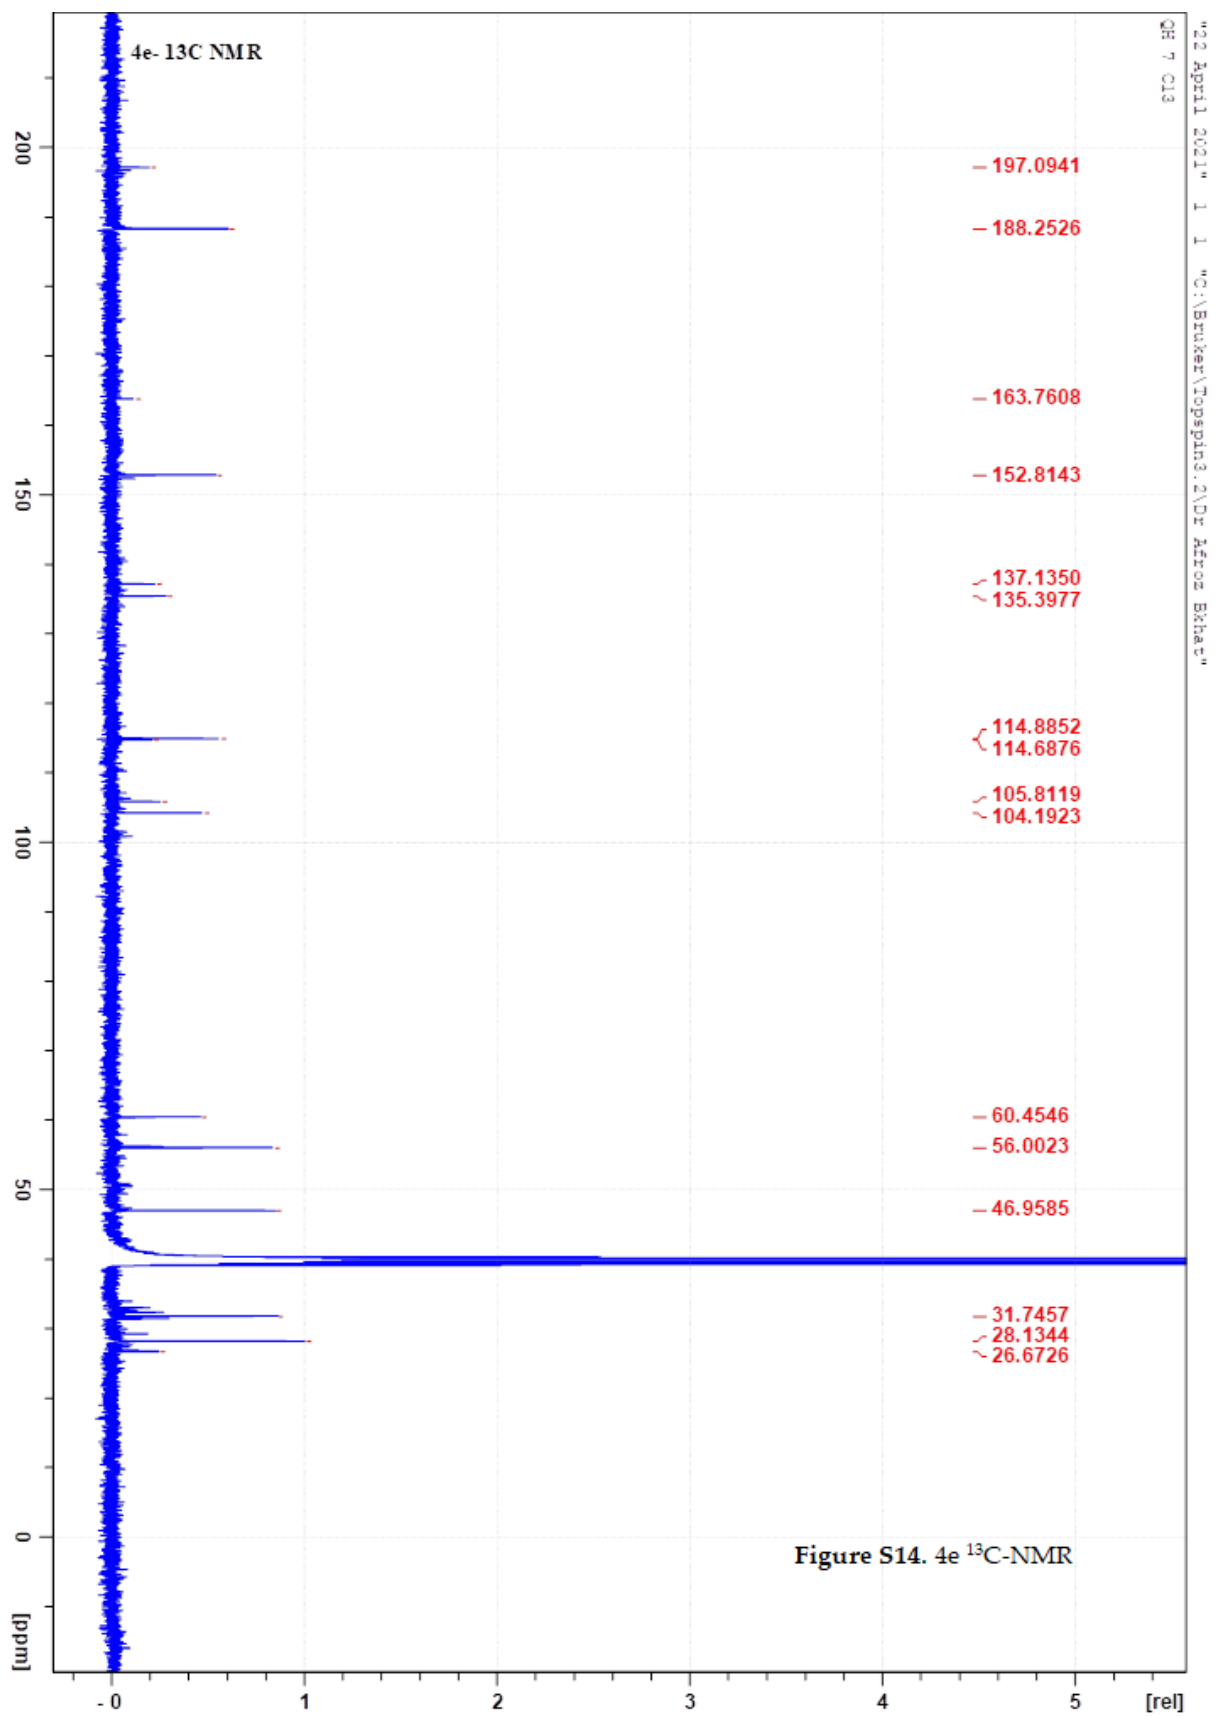

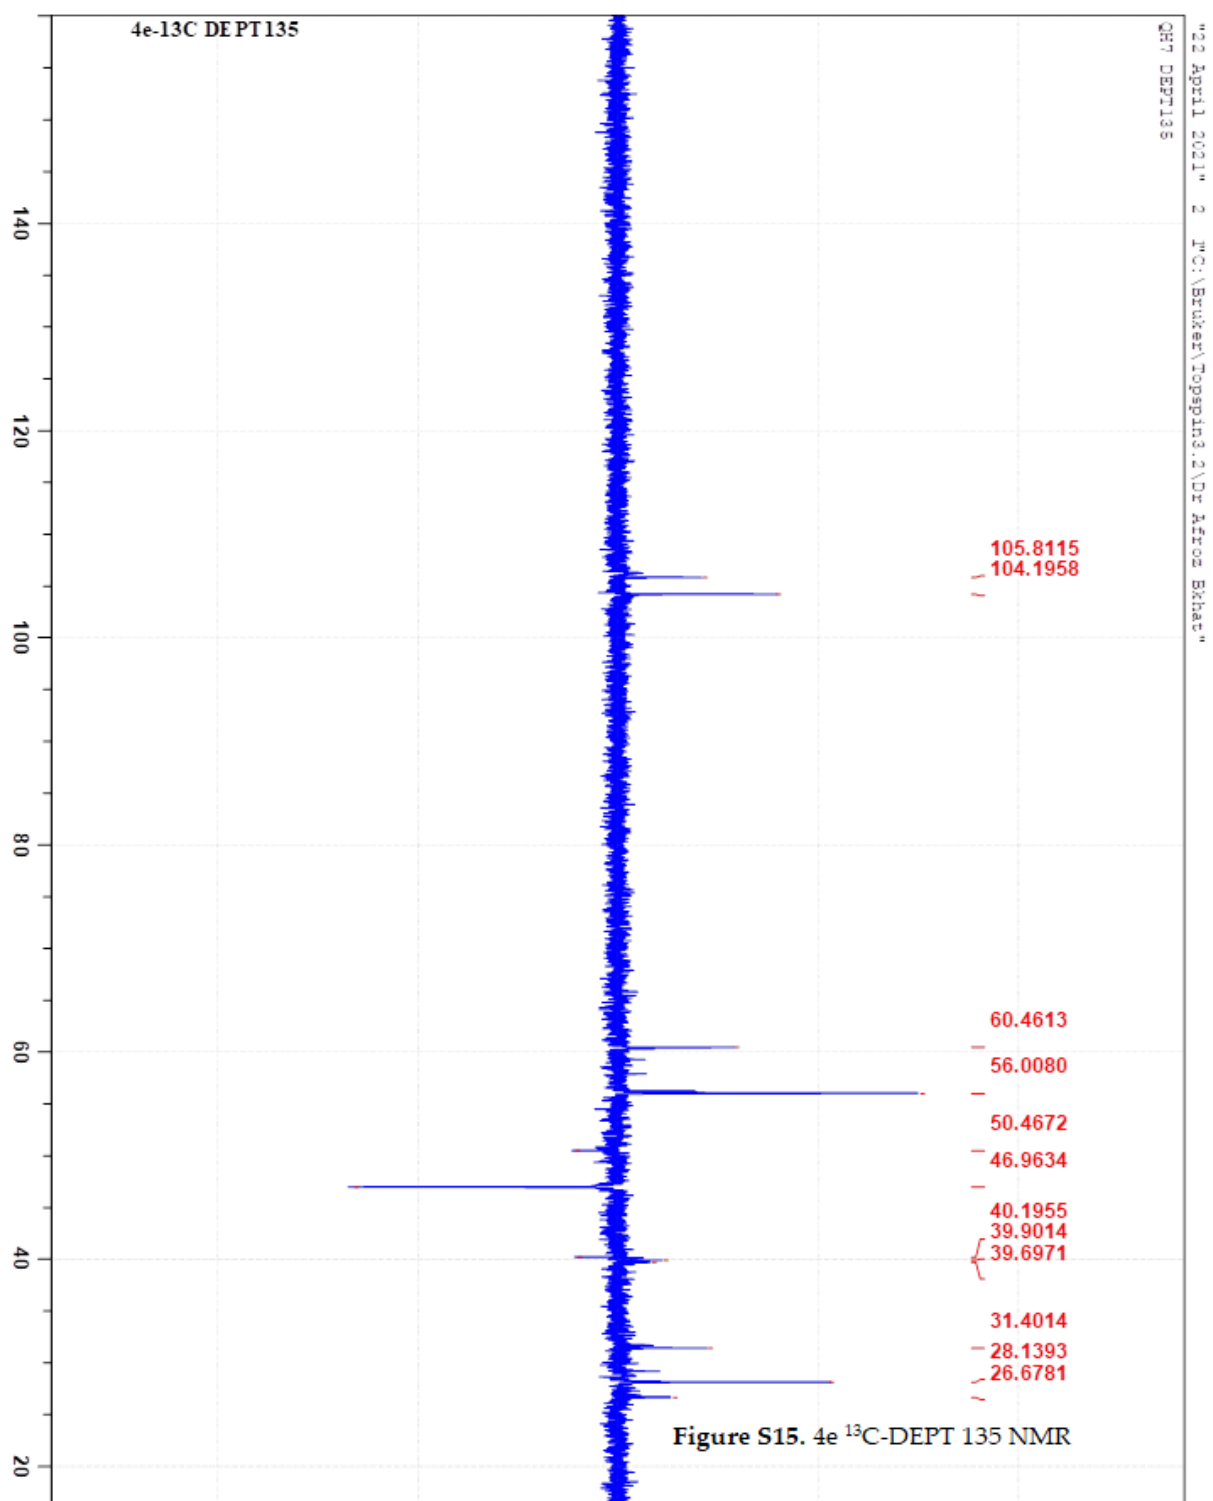



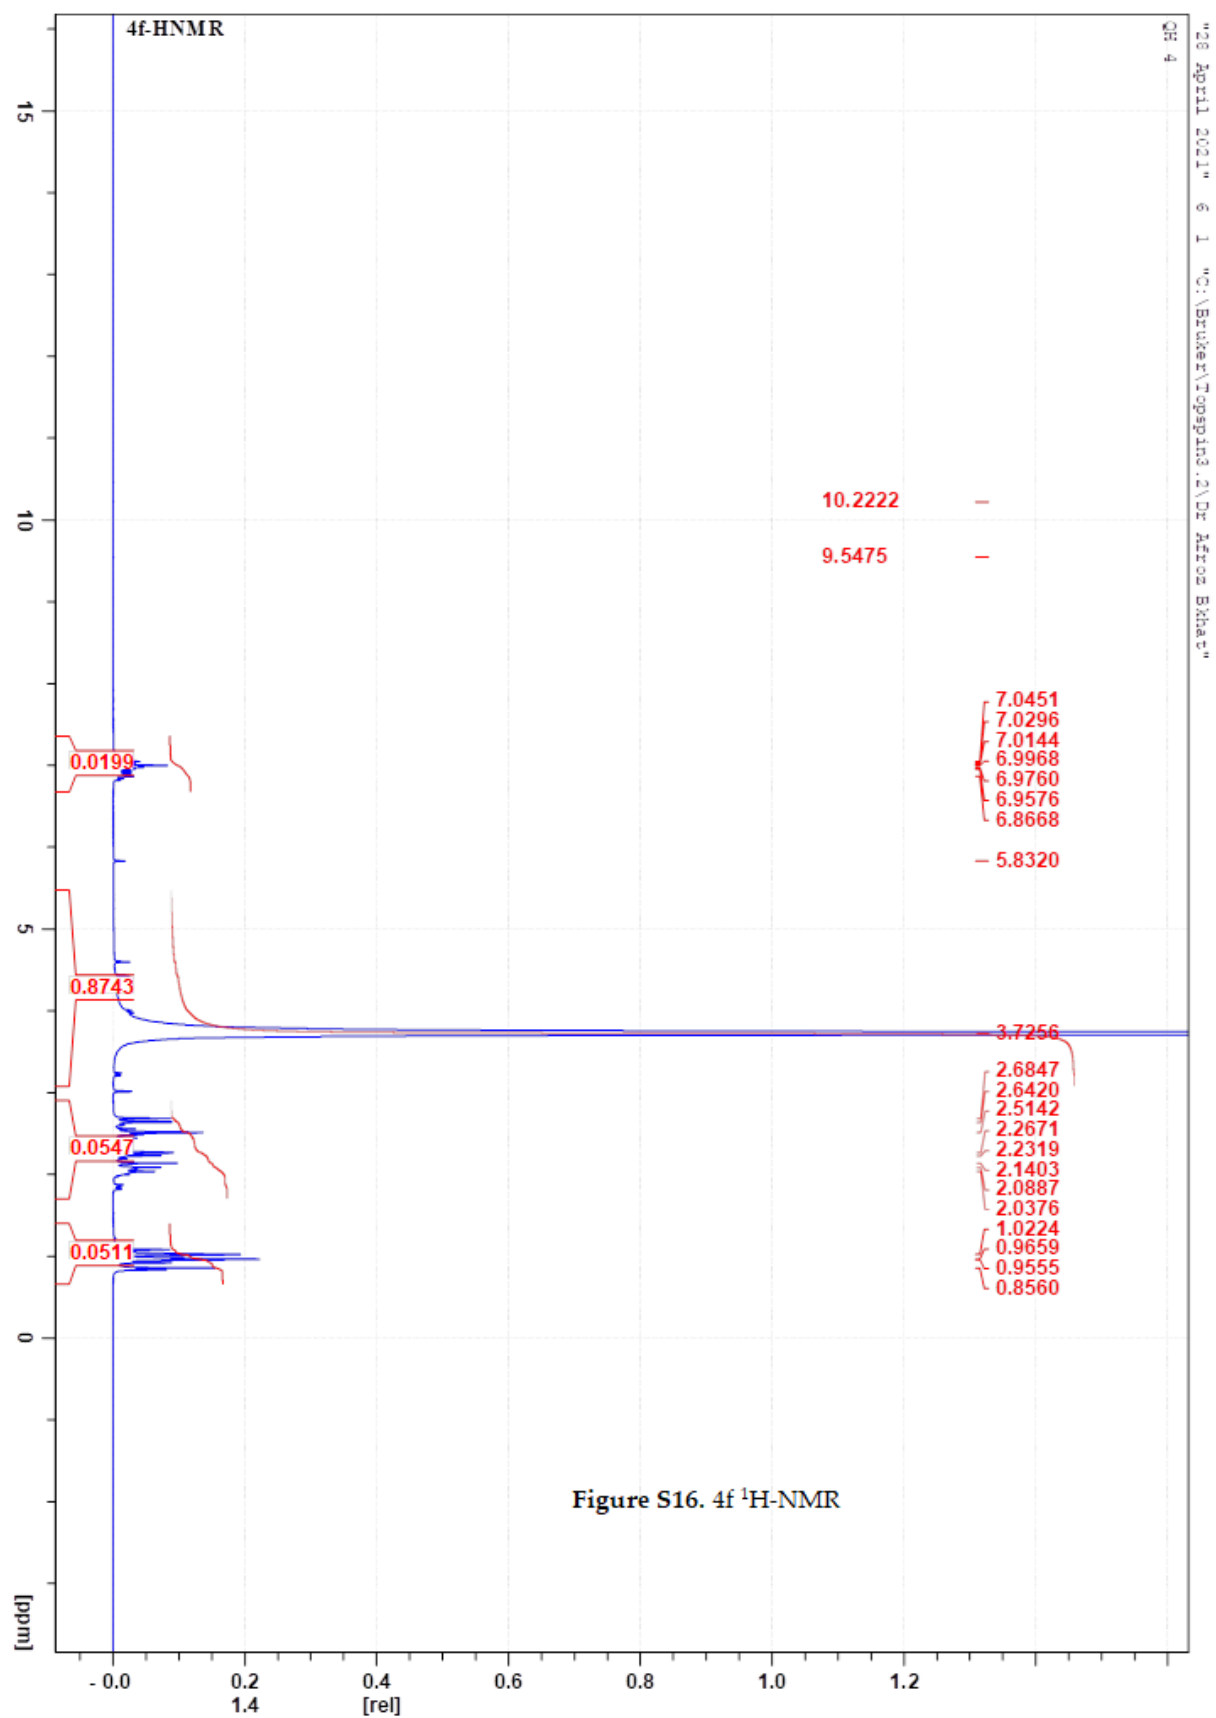

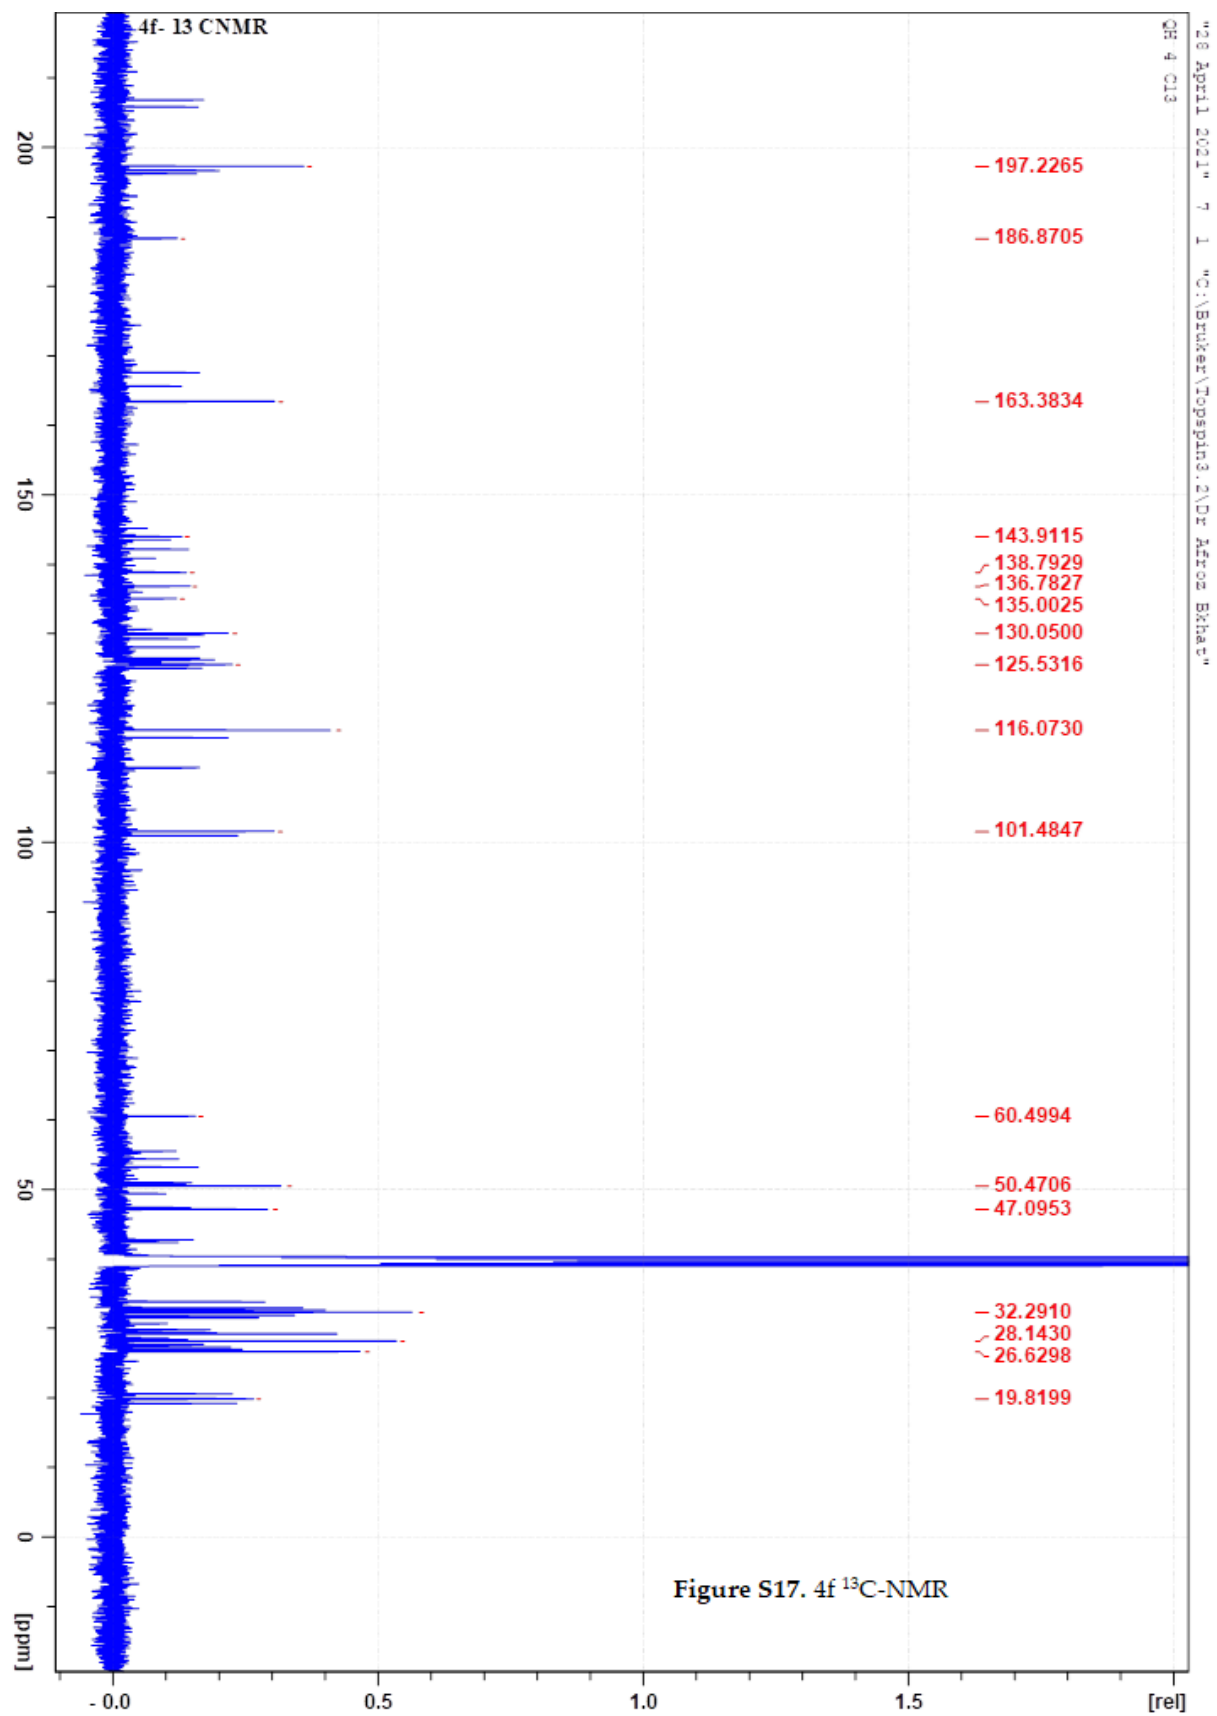

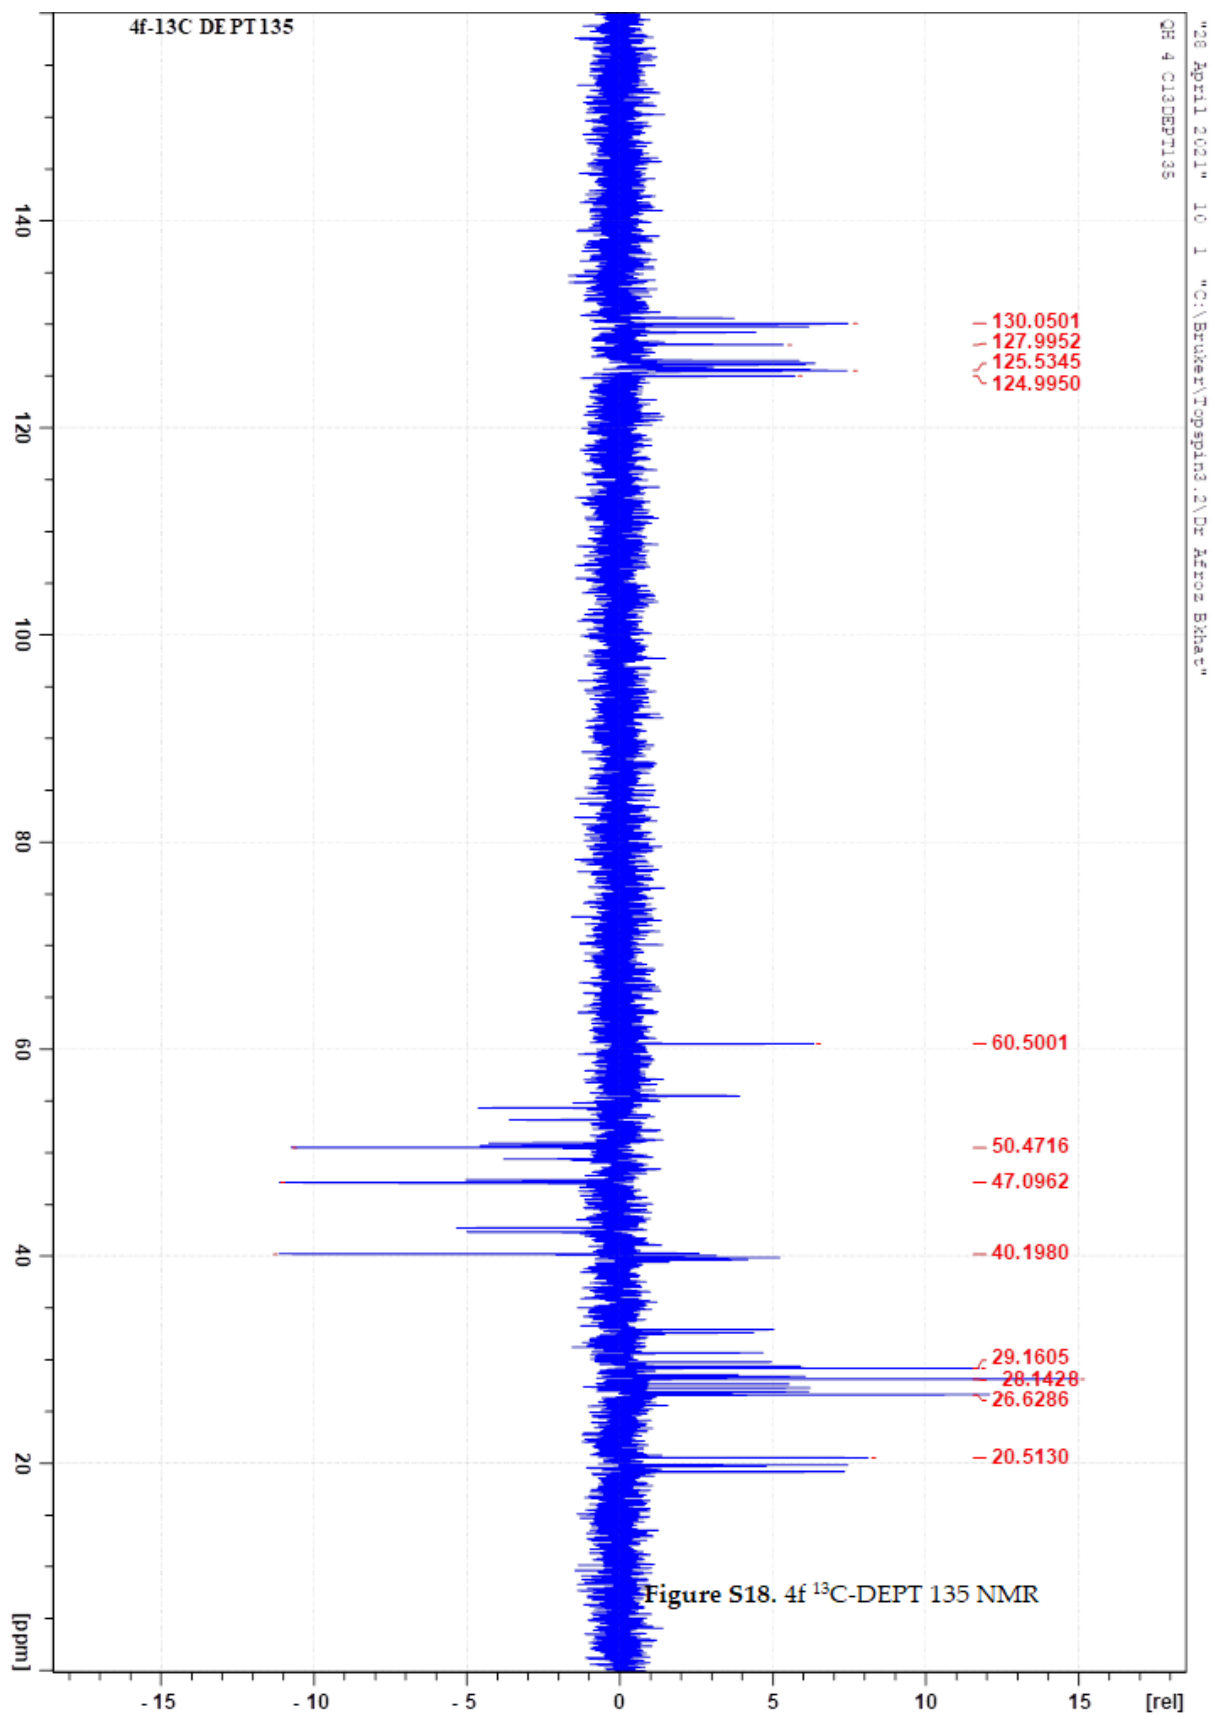

### **Catalyst yield calculation**

Yield of catalyst is simply calculated by formula

Yield (%) = Actual yield/Theoretical yield

#### **Yield (%) considering non-ultrasonic method**

- Quantity of material processed = Quantity of 25%HPW/SiO<sub>2</sub> + Quantity of 0.02 M Pd(OAc)<sub>2</sub>
  - 2.96(g) + 4.48(g) = 7.44 (g) (Theoretical yield)
- Practical yield of catalyst after complete drying = 5.95 (g)

$$\begin{aligned}\text{Yield (\%)} &= 5.95/7.44 \times 100 \\ &= 79.97 \\ &= 80\%\end{aligned}$$

#### **Yield (%) considering ultrasonic method**

Practical yield of catalyst after complete drying = 7.06 (g)

$$\begin{aligned}\text{Yield (\%)} &= 7.06/7.44 \times 100 \\ &= 95 \%\end{aligned}$$

## Effectiveness of energy consumption

### Appendix 1

#### A.1. Energy calculations

##### 1. Energy delivered during 20 min by ultrasonic method

- Energy delivered during sonication = Energy required to synthesized **catalyst**
- Electrical energy delivered during sonication using horn for 20 min (indicated by power meter) = 22.86 kJ.
- Efficiency of horn taken for calculation = 30% (estimated independently using calorimetric studies).
- Actual energy delivered by horn during sonication = Energy delivered during sonication using horn in 20 min x Efficiency of horn  

$$= 22.86 \text{ kJ} \times 30/100 = 6.85 \text{ kJ}$$

Quantity of material processed = Quantity of 25%HPW/SiO<sub>2</sub> + Quantity of 0.02 M Pd(OAc)<sub>2</sub>

$$2.96(\text{g}) + 4.48(\text{g}) = 7.44 (\text{g})$$

- Net energy supplied for processing of material using sonochemical method = Actual energy delivered by horn during sonication/Quantity of material processed

$$6.85\text{kJ}/ 7.44(\text{g}) = 0.92 (\text{kJ/g}) \text{ ----- (A1)}$$

##### 2. Energy Delivered During non-ultrasonic method

- Voltage input in magnetic stirrer (Fisher Scientific, Model C188618443308, Made in China) = 220 V.

- Current measured using digital multimeter (Model KYORITSU, Made in Japan) = 39 mA =  $39 \times 10^{-3}$  (A).  
Power input in magnetic stirrer = Voltage input x Current measured  
 $220(\text{V}) \times 39 \times 10^{-3} (\text{A}) = 8.5 \text{ W (J/s)}$
- Efficiency of magnetic stirrer taken for the calculation = 40% (estimated independently using calorimetric studies).
- Actual power input in overhead stirrer = Power input in magnetic stirrer (W) x 40/100  
 $8.5(\text{W}) \times 40/100 = 3.4 \text{ W (J/s)}$
- Time required for completion of reaction = 1h (3600 s).
- Net energy delivered during non-ultrasonic method = Power input in magnetic stirrer x Time required for completion of reaction  
 $3.4 \text{ J/s} \times 1\text{h} \times 3600(\text{s/h}) = 12,240 \text{ J} = 12.24 \text{ kJ} \text{ ----- (A2)}$
- Quantity of material processed = Quantity of 25%HPW/SiO<sub>2</sub> + Quantity of 0.02 M Pd(OAc)<sub>2</sub>  
 $2.96(\text{g}) + 4.48(\text{g}) = 7.44 (\text{g})$
- Net energy supplied for processing of material using non-ultrasonic method =  
Net energy delivered during non-ultrasonic method /quantity of material processed  
 $12.24 \text{ kJ} / 7.44 = 1.64 (\text{kJ/g}) \text{ ----- (A3)}$

### 3. Energy Saved

- Net Energy saved = (Net energy supplied for processing of material using non-ultrasonic method – (Net energy supplied for processing of material using ultrasonic method
